# Supplementary material
Source: publisher figshare collection journal article supplement (https://gsajournals.figshare.com/ndownloader/files/27678717)
Supplement: Supplementary file 1 [file 27678717]

## Sheet: Decreased Func. + Localiz. CA2
Supplemental File S4
Significantly increased Brachypodium PM protein dataset
																			NA					CA 2 days					CA 4 days					CA 6 days					CA 8 days
Bradi no.	Anova (p)	Adjusted (p)	Dunnet's (CA2)	Dunnet's (CA4)	Dunnet's (CA6)	Dunnet's (CA8)	Max fold change (/NA)	Min fold change (/NA)	Fold change (CA2/NA)	Fold change (CA4/NA)	Fold change (CA6/NA)	Fold change (CA8/NA)	Peptide Sequence	Description	Species	Category	PM Prediction (Y/N)	Predicted Localization	Experiment1	Experiment2	Experiment3	Experiment4	Average	Experiment1	Experiment2	Experiment3	Experiment4	Average	Experiment1	Experiment2	Experiment3	Experiment4	Average	Experiment1	Experiment2	Experiment3	Experiment4	Average	Experiment1	Experiment2	Experiment3	Experiment4	Average
Bradi1g02810.1	0.000855493	0.0018465	0.0125117	0.0171843	0.000257581	0.0011071	0.573908	0.299862	0.551926	0.573908	0.299862	0.393788	MAHLAGGGGDELVPTLSSLETVYGAGEEEEEEARVRFGRLGDRFRALYSASPALFARSPGRVNLIGEHIDYEGYSVLPMAIRQDMIVAISKAAHGQVRVANVEDKYAACVYPADPDKEIDIKNHKWGHYFMCGYKGVYEYGRSKGIDMGEPVGLDVVVDGTVPLGSGLSSSAAFVCSATIAIMGILEKNFPKKEVAQFTCQSERHIGTQSGGMDQAISIMAKPGFAELIDFNPIKATDVQLPQGGTFVIAHCLAESKKAETAATNYNNRVVECRLAAIVLAIKLGMDTNKAISSVTTLSDVEGLCVSFAGKEGSSDPVVAVKKLLHEEPYTTEEIEKIVGKSLASAFESSPTSLDVLRAAKQFKLFQRAAHVYSEARRVYAFRDTVSSKLSEEDMLKKL…	galactokinase isoform X1	Brachypodium distachyon	metabolism	N	cytosol, vacuole	21409.9	36859.8	26561.7	20202.4	26258.5	9165.89	18263.2	11462.8	19079.1	14492.7	15044.6	14617.2	12204.6	18413.4	15069.9	10676.5	11215	5488.06	4116.06	7873.91	5056.98	12858.9	9600.37	13844.8	10340.3
Bradi1g04140.1	5.12024e-06	2.58632e-05	0.000435186	1.82396e-06	4.62056e-06	1.29265e-05	0.660881	0.481109	0.660881	0.481109	0.521026	0.507478	MKVIEKIQEAAANGRTVFSFEYFPPRTEEGVENLFERMDRMVAHGPNFCDITWGAGGSTADVTLDIANRMQNMVCVETMMHLTCTNMPVEKIDSALDTIKSNGIQNVLALRGDPPHGQDKFVQVAGGFSCALDLVQHIKAKYGDYFGITVAGYPEAHPEVILGEEGATEEAYSNDLAYLKRKVDAGADLIVTQLFYDTDMFLKFVNDCRQIGITCPIVPGIMPINNYKGFIRMTGFCKTKIPAEITAALDPIKDNEEAVKAYGIHLGTEMCKKILASGINTLHLYTLNMEKTALAILMNLGLIEESKLSRTLPWRPPTNVFRVKEDVRPIFWANRPKSYISRTLGWDQYPHGRWGDSRNPSYGALTDYQFTRPRGSGKKLQEEWAVPLKSVQDINERFM…	Methylenetetrhydrofolate reductase	Brachypodium distachyon	metabolism	N	cytosol	320363	442462	444648	371326	394700	257138	241384	245759	299118	260849	196040	179896	163394	220246	189894	253524	219409	187366	162296	205649	197299	171951	213780	218176	200302
Bradi1g06220.2	9.53779e-07	7.52425e-06	0.00036978	1.16914e-05	4.07195e-06	2.37463e-07	0.665404	0.407887	0.665404	0.511547	0.463324	0.407887	MAPKVAVAKKGDAKAQAAKVAKAVKSGSIKKKTKKIRTSVTFHRPRTLKKARDPKYPRISTPGRNKLDQYQILKYPLTTESAMKKIEDNNTLVFIVDLKADKKKIKAAVKKMYDIQAKKVNTLIRPDGKKKAYVKLTADYDALDVANKIGII	60S ribosomal protein L23a-1	Brachypodium distachyon	protein synthesis	N	cytosol	110685	106832	100944	79265.6	99431.5	52394.4	64950	76186.7	71117.5	66162.1	51653.3	55311	45038.1	51453.1	50863.9	55031.4	46981.4	37852.7	44410.5	46069	39403.7	32817.2	47661.7	42344.8	40556.8
Bradi1g07210.1	0.0249886	0.034788	0.0442237	0.415489	0.57012	0.010483	0.731575	0.226827	0.386646	0.676095	0.731575	0.226827	MGHSNVWNSHPKNYGPGSRVCRVCGNSHGLIRKYGLMCCRQCFRSNAKDIGFIKYR	40S ribosomal protein S29-like	Brachypodium distachyon	protein synthesis	N	cytosol	7156.04	3309.47	7474.93	6027.11	5991.88	1909.12	1655.19	3246.9	2455.73	2316.74	4994.29	3328.44	1734.32	6147.29	4051.08	399.596	7560.59	3787.45	5786.43	4383.52	1798.26	1399.6	1272.54	966.085	1359.12
Bradi1g10480.1	4.30523e-09	1.26255e-07	1.48162e-08	2.00741e-11	2.88691e-10	3.44313e-12	0.552102	0.356966	0.552102	0.356966	0.42528	0.379811	MVLSHAVSAGSSDDSVHSTFASRYVRAALPRFRMPENSIPKEAAYQIINDELMLDGNPRLNLASFVTTWMEPECNKLMMDSINKNYVDMDEYPVTTELQNRCVNMIAHLFNAPLGETETAVGVGTVGSSEAIMLAGLAFKRRWQNKMKAAGKPCDKPNIVTGANVQVCWEKFARYFEVELKEVKLREGYYVMDPEKAVELVDENTICVAAILGSTLNGEFEDVKMLNDLLVKKNEETGWDTPIHVDAASGGFIAPFLYPELEWDFRLPLVKSINVSGHKYGLVYAGIGWCIWRSKEDLPEELIFHINYLGADQPTFTLNFSKGSSQVIAQYYQLIRLGFEGYKNIMDNCRENAKVLKEGLEQTGRFNIVSKDEGVPLVAFSLKDSSRHDEFEISEFLRR…	Glutamate decarboxylase	Brachypodium distachyon	metabolism	N	cytosol	1.51978e+06	1.87603e+06	1.67851e+06	1.45489e+06	1.6323e+06	820256	811436	871138	1.10196e+06	901197	573854	506882	554563	695404	582676	661451	687321	729555	698412	694185	582948	610155	624420	662340	619966
Bradi1g10630.1	7.07693e-05	0.000215991	0.00147842	0.0980259	4.62377e-05	0.000143989	0.726294	0.289959	0.47615	0.726294	0.289959	0.309528	MADAEDIQPLVCDNGTGMVKAGFAGDDAPRAVFPSIVGRPRHTGVMVGMGQKDAYVGDEAQSKRGILTLKYPIEHGIVSNWDDMEKIWHHTFYNELRVAPEEHPVLLTEAPLNPKANREKMTQIMFETFNTPAMYVAIQAVLSLYASGRTTGIVLDSGDGVSHTVPIYEGYALPHAILRLDLAGRDLTDYLMKILTERGYSFTTTAEREIVRDMKEKLSYIALDYDQEMETSKTSSSVEKSYELPDGQVITIGAERFRCPEVLFQPSFIGMEAAGIHETTYNSIMKCDVDIRKDLYGNIVLSGGTTMFTGIADRMSKEITALAPSSMKIKVVAPPERKYSVWIGGSILASLSTFQQMWIAKAEYDESGPSIVHRKCF	actin-1	Brachypodium distachyon	cell structure	N	extracellular matrix	11899.7	14701.3	20315.9	15052.7	15492.4	7689.36	7255.32	6828.27	7733.89	7376.71	9240	16429.1	9262.59	10076.5	11252	5871.98	3483.31	4774.84	3838.5	4492.16	3188.04	3092.66	8487.72	4412.87	4795.32
Bradi1g11670.1	1.20545e-06	8.88607e-06	3.86451e-05	3.52019e-07	5.42033e-06	6.69073e-07	0.51522	0.331477	0.51522	0.331477	0.33427	0.364254	MLLHGLWDKVTGKNKEAWKEGRIRGTAVLVKKDVLDLGDFHASLLDGVHKILGCEDGVAFHLVSATAADPNNGERGKVGKAAHLEELVVTMKSTAAGESVFRVAFEWDDSQGIPGAVIVRNTNRSEFLLKTLTLEGVPGRGTVVFVANSWIYPAAGDRVFFANDTYLPSKMPVLLVQYRQDELRNLRGDSKAGPYEEHDRVYRYDYYNDLGEPDKGEDHVRPMLGGSQEHPYPRRGRTGRRPTKTDPKSESRLPLLNLKKALNIYVPRDERFGHLKLSDFLGYSLKAITEAVVPIIRTYVDTTPKEFDSFQDIMNLYDGLLEVPHSPALAEIKKKIPFDFIKSILPVAGDDFLNLPFPHVVKSDRSAWRTDEEFAREMLAGVNPVCIRRLTEFPARSTL…	Lipoxygenase	Brachypodium distachyon	metabolism	N	chloroplast	128228	161702	150511	104045	136122	65184.6	61373.4	65512.4	88459.9	70132.6	44351.7	41425.4	45682.7	49024.8	45121.2	68561.8	35359.9	46841.2	31242.4	45501.3	54169.6	40244.2	52946.8	50970.5	49582.8
Bradi1g11680.1	0.00247004	0.00465376	0.0194328	0.0164151	0.212349	0.000595344	0.794046	0.467764	0.655122	0.645494	0.794046	0.467764	MIIGGIIKKIKESKNAQLKGTVVLMRKNVLDLNDFGASLLDGIGEFLGKGITCQLISSTLVDTNNGNRGKVGAEAELEQWITSLPSVTTGESKFGVTFQWEVEKLGVPGAIIVKNYHSNEFFLKTITLDNVPGRGKLTFVANSWIYPATKYRYNRVFFANDTYLPSQMPPALRPYRDDELRNLRGDDQEGPYEEHDRVYRYDVYNDLGKDRPVLGGNADYPYPRRGRTGRKPSRKQPQLESRLKSILQQIYVPRDEKFGHLKMSDFIGYSIRAITQGILPAVRTLVDCTPGEFDSFQDIINHYEGGIKLPNIPALEELRKRFPLQLIKNLLPVGGDFLLKLPIPQIIKQDKHAWRTDEEFAREVLAGINPVMITRLTEFPPKSTLDPAKYGDHTSTITA…	Lipoxygenase	Brachypodium distachyon	metabolism	N	chloroplast	1.53547e+06	2.09524e+06	2.05202e+06	1.06868e+06	1.68785e+06	1.00921e+06	1.14535e+06	919452	1.34899e+06	1.10575e+06	1.15162e+06	971448	1.08155e+06	1.15338e+06	1.0895e+06	1.56591e+06	1.44484e+06	1.26403e+06	1.08615e+06	1.34023e+06	705671	741793	820681	889918	789516
Bradi1g13890.1	0.00657462	0.0108606	0.0313435	0.559571	0.00240883	0.050983	0.84822	0.477286	0.635515	0.84822	0.477286	0.666791	MAASVKLGSKPDAFRRQGQAWFCTTGLPSDVTVEVGDMSFHLHKFPLLSKSAVLEQLIEESSDQEECTITLSDIPGGTKSFELVARFCYGVKIELSSANVVYLRCASEHLQMTEEISEDNLIAQSEMFLNQVVLRNWKDSLKALETCDDLLPHAEDLQIVKRCIESLAAKATTDPNLFGWPIREHGIMQSPGGSVLWNGISTGARPRNFSSDWWYDDASALSFPMYKRLISAMESRGVRPETIAGSLAYYARKYLPGLNRRNSTGIAPPTATLSEVEQKNLLEEINTLLPVQKGLASTKLLLGLLRIAMIQRASSTCISDLEKRVGMQLDQASLEDLLLPNFSYTMETLYNVECVHRILEHFLAMDQANGGASPCMDDVMASPSMIPITAVAKLIDGYL…	BTB/POZ domain-containing protein At1g30440	Brachypodium distachyon	protein destination and storage	Y	PM	52614.6	50141.3	83898.1	89580.3	69058.6	33752.7	48057.7	42542.3	51198.3	43887.8	49097	61965.1	53193.8	70051.5	58576.9	22869.6	39539.1	35354	34080.2	32960.7	42423.5	55904.7	51998.7	33863.8	46047.7
Bradi1g23520.1	2.02659e-08	3.87754e-07	1.08881e-05	3.04419e-07	1.44232e-10	1.59461e-12	0.651499	0.373002	0.651499	0.557986	0.416168	0.373002	MAAASTTDGGVGAILTAGERDYLVRNSGEQVKISSIEAGTVALYFSASWCPPCRRFTPKLIEAYKELASQGKSFEVVFVSGDQDEEAFNAYFAKMPWLAVPFTDSEGRKSLDERFQVRGIPHLVILDAKTGKVCTEDGVEFVSEYGIDAYPFTPERINELKEQEKAAKDNQTIHSVLSAPTRDYLISNKGDKVPISDLEGKYVGLCFVVSGYGPVEEFTTVLAKIYGKLKEVGKKFEVVAVSMDNDEASFNESFQNMPWLAIPQGDKMCQKLVSYFELNDLPTLVLIGPDGKTLNSNIADIIEENGVESWEGFPFNAEKLEILAEKARAKAESQTLQSLLVTGDLDFVIGKDGAKVPVSQLVGKTVLLYFSAQWCGPCRAFLPTLVDVYNKIKEKNSDF…	probable nucleoredoxin 1-2	Brachypodium distachyon	disease/defence	N	cytosol	369815	384627	436184	364316	388736	300572	269543	201158	241770	253261	231243	207190	198962	230241	216909	167462	180547	142102	157005	161779	150922	121487	172618	134970	144999
Bradi1g25790.1	1.75821e-05	6.74248e-05	0.00802882	0.000210509	1.22528e-05	5.26213e-06	0.57457	0.158625	0.57457	0.358482	0.209558	0.158625	MASSLDAPNLDDYLPTDSLPQEPPRSLNLRDLLDISPVLTEAAGAIVDDSFTRCFKSNSPEPWNWNIYLFPLWCFGVVVRYGLLFPLRVLTLGLGWMVFFAAFFPVHFLLKGQNKLRSKIERKLVEMMCSVFVASWTGVIKYHGPRPSSRPYQVFVANHTSMIDFIILEQMTAFAVIMQKHPGWVGFIQKTILESVGCIWFNRNDLKDREVVGRKLRDHVQRPDNNPLLIFPEGTCVNNQYTVMFKKGAFELGCAVCPIAIKYNKIFVDAFWNSKKQSFTMHLGRLMTSWAVVCDVWFLEPQYLREGETSIAFTERVRDMIAARAGLKKVLWDGYLKHNRPSPKHTEEKQRIFAESVLKRLEES	glycerol-3-phosphate acyltransferase 9	Brachypodium distachyon	metabolism	Y	PM, ER	36502.5	44303.8	40237.5	34640.1	38921	16175.6	18280.8	30425.4	24569.5	22362.8	21476.7	20936.3	12975.1	421.746	13952.5	6916.02	6577.5	10875	8256.19	8156.18	13402.2	10458.5	698.427	136.255	6173.85
Bradi1g26770.1	2.5615e-05	9.23921e-05	0.00145825	5.41934e-05	1.78624e-05	1.35717e-05	0.536817	0.298	0.536817	0.347193	0.321692	0.298	MATPPTLVLLPEWGAGHLMSMLESCKRVLLSGGRAFSITLLVMRPPTAAATSEVEAHVRREAASGLDIRIHRLPAVEPPADAAGVEEFIARYIELHAPGVRDAVAGMSCPVAALVLDLFAAPMVDVAQDLGVPSYVFMSSTGAMLALMLHLPVLHEAVTVEFEEVEGGVVHVPGLPPIPHEWMPCPVVDKKSPNYTWFVRLGERFMDATGIIANTADELEPGPLAAIAEGRAVPGRPAPPVYPIGPVLSLGSSSSKKESSSGPPHACVAWLDAQPRASVVLLCFGSMGWFEAAQVVEICAALERCGAHRFLWVLRGPPGADTGAGAPDGSEHPTDADLDELLPEGFLERTAGRVLVWPTWAPQKEILAHAAVGGFVTHCGWNSVLESLWHGVPMAPWPL…	UDP-glycosyltransferase 71C4-like	Brachypodium distachyon	metabolism	N	cytosol	148529	232813	169738	113957	166259	102957	76454.9	76176.8	101414	89250.7	63820.7	55088.7	48912.6	63074	57724	68125.4	49913.8	45354.3	50543.1	53484.2	50850.5	37499.9	48672.8	61157.9	49545.3
Bradi1g29520.1	3.98813e-07	3.68493e-06	0.00100085	6.64711e-06	1.34032e-08	3.17152e-07	0.622661	0.242023	0.622661	0.398663	0.242023	0.262308	MADLQEPLVRGKRKKVLVDYLVQFRWILVIFVVLPISSLIYFNIYLGDMWSAMKSEKKRQKEHDDNVQKVVKRLKQRNPKKDGLVCTARKPWIAVGMRNVDYKRARHFEVDLSAFRNILEIDAERMVAKVEPLVNMGQISRATCPLNLSLAVVAELDDLTVGGLINGYGIEGSSHLYGLFSDTVVALEIVLADGKVVRATKDNEYSDLFYGVPWSQGTIGFLVSAEIKLIPIKEYMRLTYTPVKGDLKEIAQGYADSFAPRDGDPSKVPDFVEGMVYNPTEGVMMTGVYASKEEAKKKGNKINSVGWWFKPWFYQHAQTALKKGEFVEYIPTRQYYHRHTRCLYWEGKLILPFGDQFWFRYLFGWLMPPKVSLLKATQGEAIRNYYHDNHVIQDMLVPL…	delta(24)-sterol reductase	Brachypodium distachyon	metabolism	Y	cytosol, PM	79346.5	118799	134319	95685.2	107038	73203.3	58172.8	60423.7	74792.7	66648.1	41225.9	43310.7	37398	48753	42671.9	33444.1	26633.2	23446.2	20098.7	25905.5	29753.4	24880.7	27184.1	30489.1	28076.8
Bradi1g30130.1	0.000237879	0.00060206	0.00256197	0.00132158	0.000123831	0.000337315	0.504011	0.315334	0.504011	0.458508	0.315334	0.363682	MRKWALSSALLLVFLLATLSPDPAKRLQVNAEESSDELADLPKVEEKLGAVPHGLSTDSEVVKRESESISRKTLRNSAEKFEFQAEVSRLMDIIINSLYSNKDIFLRELISNASDALDKIRFLGLTDKEVLGEGDTAKLEIQIKLDKENKILSIRDRGVGMTKEDLIKNLGTIAKSGTSAFVEKMQTGGDLNLIGQFGVGFYSVYLVADYVEVVSKHNDDKQYVWESKADGSFAISEDTWNEPLGRGTEIKLHLRDEAKEYLEEDKLKDLVKKYSEFINFPIYLWATKEVDVEVPADEEESSEEESTTETTEEEETEDSEEKKPKTKTVKETTTEWELLNDMKAVWLRNPKEVTEEEYSKFYHSLAKDFGDDKPMSWSHFSAEGDVEFKALLFVPPKAP…	heat shock protein 90	Brachypodium distachyon	disease/defence	N	cytosol	205685	194559	150769	90167.5	160295	64133.7	68453	82646.5	107929	80790.6	76776.3	54810.7	79826.3	82573.6	73496.7	44932.3	38518.6	62118.8	56616.8	50546.6	72889.4	51310	48378.9	60607.8	58296.5
Bradi1g34200.1	5.09947e-06	2.58632e-05	0.000834758	6.47755e-06	9.53011e-06	2.81849e-06	0.601247	0.362005	0.601247	0.418174	0.362005	0.384692	MGVYTFVCRSSGGEWTAKQHKGELEASAATTYDLHRQLVAAASAADSSAGVQSSFTAVSPTSAICQVIIGAVGGGAMVGGPAAGGAPASGGAAAEAPKAEEKKEEEKEESEDDLGFSLFD	60S acidic ribosomal protein P3	Brachypodium distachyon	protein synthesis	N	cytosol	12372	15187.5	17624.4	12120	14326	7656.95	8058.65	10936.9	7801.29	8613.45	6617.29	4630.92	5347.17	7367.62	5990.75	3183.19	7143.67	5731.24	4686.18	5186.07	5197.77	6403.96	5267.99	5174.64	5511.09
Bradi1g34750.1	5.93646e-05	0.000187548	0.00456557	0.000176882	1.16874e-05	0.000375793	0.643148	0.389299	0.643148	0.483091	0.389299	0.52558	MALSGWRRSPAARRPASLCLWIALVAATLVLAQAKKSNADLSTVTHKVYFDIEIEGKPAGRVVMGLFGKAVPKTAENFRALCTGEKGTGKSGKPLHYKGSSFHRIIPSFMIQGGDFTLGDGRGGESIYGTKFADENFKLKHTGPGFLSMANAGRDTNGSQFFITTVTTSWLDGKHVVFGKVLSGMDVIYKVEAEGQQTGTPKSKVVIADSGELPL	peptidyl-prolyl cis-trans isomerase	Brachypodium distachyon	protein destination and storage	N	chloroplast, Golgi, ER	111989	160248	132276	103688	127050	59607.8	77715.2	89052.2	100473	81711.9	56134	52120.3	62839	74413.8	61376.8	34551.6	43648.5	57451.3	62190.7	49460.5	66412.2	72567.5	52628	75492.3	66775
Bradi1g36700.1	3.22063e-05	0.000114032	0.0323434	5.58237e-05	0.00017335	2.06888e-05	0.595816	0.073436	0.595816	0.168433	0.239619	0.073436	MEEVTEAVNNLAITEPHKKNRIQVSNTKKPLFFYVNLAKRYMQVHNEVELSALGMAIATVVTVAEILKNNGLAMEKKIMTSTVDVNDESRSRPMQKAKIEIVLGKTENFDELMAIAAEEREVAAAEEGEEQS	Alba domain-containing protein-like	Brachypodium distachyon	protein synthesis	N	cytosol, ER, nucleus	6275.1	10018.5	11823.7	12419.7	10134.3	4690.42	7329.49	5038.31	7094.42	6038.16	2877	1624.59	1164.43	1161.75	1706.94	6848.48	683.756	926.839	1254.39	2428.36	5.66956	626.701	1119.02	1225.49	744.22
Bradi1g39090.1	4.86713e-06	2.50601e-05	0.000480617	0.00639757	3.87606e-06	6.21966e-07	0.747773	0.440576	0.651897	0.747773	0.519555	0.440576	MALHAPVLVLKDSLKRESGAKVHHANIQAAKAVADIIRTTLGPRSMLKMLLDASGGIVVTNDGNAILREIDIAHPAAKSMIELSRTQDEEVGDGTTSVIVLAGEMLHVAEAFIEKNYHPTVICRAYTKALEDALAVLDKIAMPVDVNDRGAMLGLVKSSIGTKFTGQFGDLIADLAIDATTTAGVDLGQGMREVDIKKYIKVEKIPGGQLEDSRVLKGVMFNKDVVAPGKMKRKIVNPRIILLDCPVEYKKGENQTNAELMKEEDWQVLLELEEEYIKNLCAQILKFKPDLVVTEKGLSDLAIHYLSKAGVSAIRRLRKTDNNRIAKACGAVIVNRPEELQESDVGTRAGLFEVKKIGDEFFSFIVDCKDPKACTVLLRGASKDVLNEVERNLQDAMSV…	T-complex protein 1 subunit gamma	Brachypodium distachyon	protein destination and storage	N	cytosol, cytoskeleton	34228.8	39961.6	45157.3	33489.2	38209.2	17619.6	27139	24556.2	30319.2	24908.5	27710.8	28851	26957.9	30767.6	28571.8	20824.8	19876.3	18524.9	20181.2	19851.8	19234.1	16358.8	15430.5	16312.7	16834.1
Bradi1g42000.1	5.11394e-06	2.58632e-05	0.00126624	8.25771e-07	5.34799e-07	4.33711e-05	0.535048	0.20661	0.535048	0.20661	0.224664	0.361485	MWRLKVSEGGGPWLRSVNNFLGRAVWEFEPDLGTPEERAEVERVRREFTEHRFQKKESQDLLMRMQYAKQKHPQLDLPAIKLLDSAEVTEEIILTSLRRALSQHSSLQAHDGHWACDYSGILFIMPILVFALHVTGSLNAVLSIEHRREICRYIYNHQNEDGGWGTQVLGPSTMFGSCLNYVTLRLLGELDNTDALTKGRAWILSRGSASAIPQWGKIWLSVIGLYEWSGNNAIVPELWLVPHFLPIHPGRFWCFCRMVYMPMSYLYGKKFVGPITPTIFAIREEIYNVPYHEIDWNKARDTCAKEDLRYPRTLLQNVIWTCLNKCVEPVLNCWPINKLRDAALKNLIKHIHYEDEVTKYIGICPIVKALNMICCWSDDPNSDALKLHLPRIYDYLWLA…	Terpene cyclase	Brachypodium distachyon	metabolism	N	cytosol, chloroplast	287744	288907	189664	168901	233804	113199	104322	128912	153952	125096	42507.3	31974.2	36098	82645	48306.1	68922.8	32922.4	56479.9	51784.4	52527.4	101983	66062	77763.3	92257.8	84516.5
Bradi1g44460.1	6.93376e-06	3.23655e-05	0.00159979	7.21447e-05	6.59693e-06	1.20015e-06	0.56195	0.23667	0.56195	0.405709	0.26972	0.23667	MAAAAVASNGGAANAPAPGRLASVYSEVQTSRLTHMLPLPSVLRSHFTLADGPASSAAGNPDEIAKLFPNLYGQPSASVVPSAEPVPAKPLKIGVVLSGGQAPGGHNVICGIFDYLQERVKGSTMYGFKGGPAGVMKGKYVELTSDFVYPYRNQGGFDMICSGRDKIETPEQFKQAEDTVNRLDLDGLVVIGGDDSNTNACLLGEYFRGRNLKTRVIGCPKTIDGDLKSKEVPTSFGFDTACKIYSEMIGNVMTDARSTGKYYHFVRLMGRAASHITLECALQTHPNVALIGEEVAEKKETLKNVTDYITDIICKRAELGYNYGVILIPEGLIDFIPEVQKLIAELNEILAHDVVDEAGAWKSKLQPESRQLFDFLPKTIQEQLLLERDPHGNVQVAKI…	Pyrophosphate--fructose 6-phosphate 1-phosphotrasferase subunit beta	Brachypodium distachyon	metabolism	N	cytosol	61529.4	104557	118371	76013.6	90117.8	46896.5	43145.1	51924.7	60600.4	50641.7	33862.6	39280.9	33286.3	39816.7	36561.6	25278.8	27682.3	24757.6	19507.6	24306.6	24718.8	18437.4	26057.7	16098.9	21328.2
Bradi1g46670.1	5.58942e-06	2.74187e-05	0.000708037	6.80614e-05	2.63225e-06	9.50023e-06	0.534733	0.239755	0.534733	0.423231	0.263052	0.239755	MAAKLTRLHSLRERLGATFSSHPNELIALFSRYVHQGKGMLQRHQLLAEFDALMDGDKEKYAPFEDILRAAQEAIVLPPWVALAIRPRPGVWDYIRVNVSELAVEELTVSEYLAFKEQLVDEHASSNFVLELDFEPFNASFPRPSMSKSIGNGVQFLNRHLSSKLFQDKESLYPLLNFLKAHNHKGTTMMLNDRIQSLRGLQSALRKAEEYLISIPEDTPCSEFNHRFQELGLEKGWGDTAKRVHDTIHLLLDLLEAPDPANLEKFLGTIPMMFNVVILSPHGYFAQSNVLGYPDTGGQVVYILDQVRALENEMLLRIKQQGLDITPKILIVTRLLPDAVGTTCGQRLEKVIGTEHTDILRVPFRTEKGILRKWISRFDVWPFLETYTEDVANELMREM…	Sucrose synthase	Brachypodium distachyon	transporter	Y	PM	65842	92979.5	121466	100149	95109.1	35972.9	69128.6	40620.5	57709.9	50858	45757.5	44605.2	37512.3	33137.4	40253.1	29823.3	19540.3	23610.4	27100.6	25018.7	19983.2	26817.8	23652.9	20757.7	22802.9
Bradi1g48010.1	2.48972e-06	1.54776e-05	0.000370161	3.01041e-05	9.99647e-08	1.94167e-05	0.528663	0.218399	0.528663	0.382668	0.218399	0.260463	MSSPAPQAAAAAAPMAVDDAEDDQLASMSTEDIVRASRLLDNEIRVLKDEVQRTNLELESLKDKIKENQEKIKLNKQLPYLVGNIVEILEMNPEDEAEEDGANIDLDSQRKGKCVVLKTSTRQTIFLPVVGLVDPDTLKPGDLVGVNKDSYLILDTLPSEYDSRVKAMEVDEKPTEDYNDVGGLEKQIQELVEAIVLPMTHKDRFQKLGIRPPKGVLLYGPPGTGKTLMARACAAQTNATFLKLAGPQLVQMFIGDGAKLVRDAFQLAKEKAPCIIFIDEIDAIGTKRFDSEVSGDREVQRTMLELLNQLDGFSSDERIKVIAATNRADILDPALMRSGRLDRKIEFPHPSEEARARILQIHSRKMNVNPDVNFEELARSTDDFNGAQLKAVCVEAGML…	AAA+ ATPase	Brachypodium distachyon	transporter	Y	PM	17538	35900.2	30692.7	27413.7	27886.2	14009.2	15534.8	13610.7	15814.8	14742.4	10162.6	11327.8	11444	9750.15	10671.1	4112.37	7732.21	6226.42	6290.21	6090.3	8940.19	6961.22	5833.51	7318.36	7263.32
Bradi1g56910.1	1.60268e-05	6.30327e-05	0.036971	2.89301e-05	0.000105712	1.19989e-05	0.614654	0.063042	0.614654	0.13849	0.207743	0.063042	MASSADPATEPYVVEDCRGVLQLLSDGTVVRSAALPFPAGNDDGLDNDGRVEWKDAVYDAGRGLGLRMYKPAAAEKKLPVLVYFHGGGFCIGSYAWPNFHAGCLRLAASLPAVVLSFDYRLAPEHRIPAAHEDAAAALLWLRSQLASDTSNPWLADAADPRRVFVSGESAGGNLAHHLALRFGASGLDPVAHIAGYILLMPAFMSEQPTRSELDSPATAFLTRDMCDRYGRLSFPAGANRDHPLLNPLGPESPSLDPLLDVAMLVVAAEGDLLRDKNVEYAERLKALAAEKGKGKEENVELVVFQGEEHAFFGVKPMSEAAGELVRVIGRFVARSGSGTGGGQMS	probable carboxylesterase 15	Brachypodium distachyon	disease/defence	N	cytosol	11696.4	18688.3	11394.5	8715.13	12623.6	5852.33	4713.56	9966.27	10504.4	7759.14	1052.46	2586.31	1873.25	1480.98	1748.25	2771.62	2159.52	2797.66	2761.07	2622.47	683.126	2463.92	0	36.2205	795.817
Bradi1g59420.1	4.39112e-07	3.97253e-06	5.35733e-05	1.79792e-09	5.56739e-06	0.000347047	0.635486	0.250697	0.560275	0.250697	0.494015	0.635486	MGRKWSMFAGGLTFLVGAALNGAAENIAMLIIGRILLGVGVGFANQSVPVYLSEMAPARLRGMLNIGFQLMITIGILAAALINYGTNKIKSGYGWRVSLALAAVPAGIITLGSLFLPDTPNSLIERGHPESARAMLARIRGADVDISAEYGDLVVASEESKLVTHPWRNILERRYRAQLTMAIAIPFFQQLTGINVIMFYAPVLFETLGFKGDGALMSAVITGLVNVFATLVSVFTVDRLGRRKLFLQGGSQMLLSQLVVGTLIAVRFGTSGVGEMPKGYAAAVVLFICVYVAGFAWSWGPLGWLVPSEIFPLEIRPAGQSINVSVNMLFTFVIAQAFLTMLCHLKFGLFYFFAGWVVIMTVFIALFLPETKNVPIEEMVLVWKGHWFWKRFIADEDVH…	sugar transport protein MST3	Brachypodium distachyon	transporter	Y	PM	41611.3	33128.1	30686.1	39159.9	36146.3	19908.9	19070	20923	21105.7	20251.9	10259.1	11358.7	7700.69	6928.58	9061.77	19941.3	18160	19076.8	14249.2	17856.8	20158.2	22034	30270	19419.9	22970.5
Bradi1g60310.1	2.22578e-06	1.43664e-05	0.0135969	6.45029e-05	6.20389e-07	8.43679e-07	0.614363	0.0644728	0.614363	0.304626	0.0644728	0.089219	MAAAAAGGAPRALSQREQDIQMMLAADVHLGTKNCDFQMERYVFKRRSDGIYIINLGKTWEKLQLAARVIVAIENPQDIIVQSARPYGQRAVLKFAQHTGANAIAGRHTPGTFTNQLQTSFSEPRLLILTDPRTDHQPIKESALGNIPTIAFCDTDSPMRYVDIGIPANNKGKQSIGCLYWLLARMVLQMRGTILPGHKWDVMVDLFFYRDPEEAKEQDEEEALVAPEYGAPPVDNWGDLPALSAAPTGAEWGSAVPAPVAGEGWEAPSVPLPADASVPAPGPAPATGWEEGSAPAATGWQ	40S ribosomal protein SA	Brachypodium distachyon	protein synthesis	N	cytosol	9135.75	9320.81	8232.72	4259.57	7737.21	4353.89	3599.42	5904.48	5156.02	4753.45	2586.5	3268.2	1465.94	2107.19	2356.96	1158.16	216.021	621.181	0	498.839	460.863	0	1162.94	1137.43	690.306
Bradi1g60320.1	2.9875e-05	0.000106617	0.000573878	0.00207866	1.64354e-05	4.50459e-05	0.423468	0.0945974	0.333325	0.423468	0.0945974	0.10862	MGEAAGDRVLSRLQSVRERIGDSLSAHPNELVAVFTRLVNLGKGMLQPHQIISEYNTAIPEAAREKLKDGAFEDVLRAAQEAIVISPWVALAIRPRPGVWEYIRVNVSELAVEELSVPEYLQFKEQLVEGSNKDFVLELDFEPFNASFPRPSLSKSIGNGVQFLNRHLSSKLFHDKESMYPLLNFLRAHNYKGMTMMMNDRIRSLSALQGALRKAEEHLSGLPADTPYSDFHHRFQELGLEKGWGDCAKRAQETLHLLLDLLEAPDPSTLEKFLGTIPMVFNVVILSPHGYFAQANVLGYPDTGGQVVYILDQVRAMESEMLLRIKQQGLDITPRILIVTRLLPDATGTTCGQRLEKVLGTEHTHILRVPFRTENGIVRKWISRFEVWPYLETFTDDVA…	Sucrose synthase	Brachypodium distachyon	metabolism	N	cytosol	18668.6	30032	50014.1	31474	32547.2	10586.3	13406.6	8675.67	10726.6	10848.8	11601.5	12504.1	15049.5	15975.6	13782.7	5060.67	801.902	4613.83	1839.11	3078.88	2687.33	4311.86	4852.23	2289.62	3535.26
Bradi1g60730.1	2.70961e-09	8.83485e-08	5.114e-05	5.06832e-08	1.09901e-12	3.63487e-12	0.636204	0.184427	0.636204	0.45567	0.184427	0.25389	MKFNIANPTTGCQKKLEIDDDQKLRVFFDKRISQEVLGDHLGEEFKGYVFKIMGGCDKQGFPMKQGVLSSGRVRLLLHRGTPCFRGYGRRDGERRRKSVRGCIVSQDLSVINLVIVKKGDNDLPGLTDTEKPRMRGPKRASKIRKLFNLAKDDDVRKYVNTYRRTFTNKNGKKVSKAPKIQRLVTPLTLQRKRARIAKKKQRIVKKKSEAAEYQKLLAQRLKEQRDRRSESLAKKRSRLSTAKAAPAATA	40S ribosomal protein S6	Brachypodium distachyon	protein synthesis	N	cytosol	175440	238969	220224	190154	206197	124328	150778	114405	135222	131183	100917	96982.7	77413.2	100518	93957.8	48096.7	47557.7	37773.4	18685.2	38028.3	50726.2	46841.6	59134.1	52703.2	52351.3
Bradi1g67120.1	0.00228085	0.00435201	0.0370923	0.0562946	0.00281018	0.00073688	0.527985	0.142548	0.489713	0.527985	0.260387	0.142548	MSRPSRSDAHLSPVDEATRVAEVREYYDDAAPKRHTKPSRSEHSAVYADALADDSHPELDKLQQLEAHTGKLVCEGGKAGEEFVETEYYRDLGCVGKQHHTTGTGFIKMDKPTGASFELSDDPDATERHASCKGNPATNEWIPSADTVYLASDKPSRSDS	uncharacterized protein	Brachypodium distachyon	unclassified	N	cytosol	6461.42	15466.7	9876.43	5108.17	9228.18	5015.17	2990.96	4197.68	5872.8	4519.15	3660.87	4917.44	4164.52	6746.54	4872.34	3037.83	3375.99	2190.8	1006.97	2402.9	801.863	212.931	2138.39	2108.67	1315.46
Bradi1g67517.1	0.000954602	0.00201789	0.0162968	0.00294966	0.000769215	0.000585155	0.662572	0.493091	0.662572	0.575188	0.506098	0.493091	MSKKKSKNLQMVLSDGNGAAAASVVTGSAIAASYNDQIRPLLDAVDRLRHLKVTQEGIQLPTIVVVGDQSSGKSSVLESLAGISLPRGQGICTRVPLVMRLQDDPSADSPVLQLEYSNGRAVATTEAKVADAINAATAEIAGSGKGISDAPITLVVRKRGVPDLTLVDLPGITRVPVQGQPDDIYDQIARIIKEYIAPKESIILNVLTATVDFPTCESIRMSQQVDRTGERTLAVVTKVDKAPEGLLEKVTMDDVNIGLGYVCVRNRIGEETYDQARVEEEKLFKYHPLLSKIDKDMVGIPVLAQRLMQIQATIIAKCLPDIVRQINDRLSRNSTELEQMPPDVTSVADAVKEFIRIVKQVCGSLEKILVRGEFDDFPDDGHFHGTARVAEMLNRYAKK…	dynamin-related protein 4C	Brachypodium distachyon	cell structure	N	cytoskeleton	21893	38521.7	41589.9	28905.3	32727.5	23731.1	21023.8	19315.8	22666.5	21684.3	20880.6	17085.9	19317.9	18013.4	18824.4	19540.3	15734.6	18095.3	12883.1	16563.3	13048.3	12760.5	17970.7	20771	16137.6
Bradi1g67840.1	0.00135884	0.0027565	0.00595701	0.0488974	0.00148578	0.000834018	0.485851	0.0868988	0.285089	0.485851	0.141686	0.0868988	MEMQFAAVLASLALGGALLVLFFGKWWQPLADADRRVKELDDAVEALLQLRAAVLKQLDGAPESEQTRAWLRRAQEAQDEVASIKARHDAGQLYVIRLLQYFLAAGAVAAGALAEKQLKIVRAIQEQGAALLEAALATPQAPPPLLLQPEELELPLPATTGATRARLNEALRFLGDCDAALGVWGAGGVGKTTLLKHVRGVCGRVAPFFDHVFLVAASRDCTVANLQREVVAVLGLREAPTEQAQAAGILSFLRDKSFLLLLDGVWERLDLERVGIPQPFGVVAGRVRKVIVASRSETVCADMGCRKKIKMERLNEDDAWNLFEGNVGEEAVRWDTQISTLARQVAAECKGLPLCLAIVGRAMSNKRTPEEWSNALDKLKNPQLSSGKSGPDESTHALV…	probabale disease resistance protein At1g61300	Brachypodium distachyon	disease/defence	N	cytosol	22358.1	16947.6	9494.76	5036.2	13459.2	2446.5	3668.24	3635.1	5598.42	3837.07	6984.84	4494.16	7300.75	7376.87	6539.15	1004.05	1821.33	2815.54	1986.98	1906.97	1683.1	493.025	1004.52	1497.69	1169.59
Bradi1g67960.1	0.000100445	0.000288298	0.00714229	0.00125354	4.57639e-05	3.52104e-05	0.565207	0.269117	0.565207	0.459978	0.288478	0.269117	MASGGGGCLPAMDLMRSEPMQLLQVIIPTESAHLAVSYLGDLGLIQFKDLNADKSPFQRTYAAQIKRCGEMARKLRFFKEQMSKAGIQISPVQLTETPLDFDDMEIKLGELEAELTEVNANDEKLQRTYNELLEYSTVLQKAGEFFYSAQRSAAAQQREMETSQSGDISLESPLLEQDMFTDASKQVKLGSLSGLVPKEKAMAFERILFRATRGNILLRQESVDEPVTDPQSGEKVSKNTFVIFYSGERAKAKILKICDAFRANRYPFPEDLGKQMHTVQEVSGKISELKATIDMGLAHRDSILKTIALEYEHWNHLAKKEKSIYHTLNMLSVDVTKKCLVGEGWSPVFATSQVQDALQRATLESKSQVGSIFQVLNTKESPPTYFQTNKFTSAFQEIV…	V-type ATPase	Brachypodium distachyon	transport	N	vacuole	362072	490108	567413	265559	421288	264403	205708	190189	292159	238115	183182	165297	176751	249903	193783	191219	124027	90414.2	80469.8	121532	102480	96467.8	127294	127262	113376
Bradi1g72080.1	1.0868e-05	4.59589e-05	1.713e-06	0.000181281	5.47014e-05	1.02122e-05	0.4539	0.249482	0.249482	0.4539	0.407903	0.321497	MESDSKSAVCCMCGDHGLLPELFRCAACSVRSQHTYCTDRYPKAEAYGTCNWCLKTGQSATGNAAPSIPASSTLEAIAARPPGAAHGSDPTTCSRLMPPPANKVVVAARGDFAAELNKPIKKQQLQQQRRKLLLRRSASDLGSGRGGAGPPSPGVVARGRPRVRRYKLLEEVISS	uncharacterized protein	Brachypodium distachyon	unclassified	N	nucleus	5482.03	5270.48	2931.32	4387.72	4517.89	1117.76	1448.25	974.985	967.542	1127.13	2138.47	1811.88	2696.8	1555.52	2050.67	1985.3	2142.82	1289.15	1954.16	1842.86	1487.64	1763.99	882.294	1676.03	1452.49
Bradi1g74922.1	0.01176	0.0180481	0.0047151	0.14367	0.0143327	0.31117	0.830426	0.604323	0.604323	0.782269	0.659538	0.830426	MATPPTQGEPSSSDPKSKKDYSTAILERKKSPNRLVVDEATNDDNSVVALHPDTMERLQLFRGDTVLLKGKKRKDTICIVLADETCEEPKVRMNKTVRKNLRVRLGDVVSVHQCPDVKYGKRVHILPIDDTVEGITGNLFDAFLKPYFLEAYRPLRKGDLFLVRGGMRSVEFKVIETDPAEYCIVAPDTEIFCDGEPIKREDEERLDEVGYDDVGGVRKQMAQIRELVELPLRHPQLFKSIGVKPPKGILLFGPPGSGKTLIARAVANETGAFFFLINGPEIMSKLAGESESNLRKAFEEAEKNAPAIIFIDEIDSIAPKREKTNGEVERRIVSQLLTLMDGLKSRAHVIVMGATNRPNSIDPALRRFGRFDREIDIGVPDEVGRLEVLRIHTKNMKLA…	cell division protein 48 homolog	Brachypodium distachyon	growth/development	N	nucleus	395690	350953	304166	205440	314062	182312	194680	152736	229451	189795	247053	204939	233946	296786	245681	195295	211514	245852	175881	207136	257105	273703	264135	248277	260805
Bradi2g02000.1	1.10109e-05	4.64176e-05	0.0295064	6.29731e-05	7.83092e-06	1.32618e-05	0.630747	0.132205	0.630747	0.245538	0.132205	0.153405	MAMDDVSAASLDAFAASSSSSAPASADPSHGWQKVTYPKRHRKPQPAPSTAPAGADLANGGRPGVFEGVDKRAQDRHRAIQAARDAAADADGPIAAWARSDDSDDDSDEAAARSSAQPAEEKKPKKPKVKKPKVTVLDAARLIDAENLEAHLVDISASYENQEGIQLMRFADYFGRAFASVSAAQFPWAKMFKESPVDKMVDIPLCHIPEPVCKTASDWINRKSPEALGEFVLWCIDSIMSELSGQAVGPKNSKKVVQQTPKAQVAIFVVLALTLRRKPEVLINLSPKIVGNSKNLVPEKLPIVAWVIAQASQGDLVSGMFCWAHSLFPTICGKSSVNPQSRDIVLQLLERFYSPIKAQAILLNGAIRKGERLIPPSAFDLFMRCAFPLSNARVKATER…	uncharacterized protein	Brachypodium distachyon	unclassified	N	ER	5725.17	11438.8	8366.78	9373.94	8726.18	2451.47	5751.63	7036.38	6776.57	5504.01	2015.63	2167.25	1956.79	2430.78	2142.61	1235.91	471.324	2285.4	621.95	1153.65	1390.36	1159.69	368.628	2435.89	1338.64
Bradi2g04080.1	0.0240365	0.0335664	0.0158339	0.158292	0.0308788	0.0184227	0.646039	0.439238	0.439238	0.646039	0.497817	0.452692	MYAAQSHRCRRARERGIHAHGGVARKRTSLSPPQVLLCFIGAAVLLANARHALFAKVDAKAVADGDTMTVHVDTADPREFGNVPPEVQEAVAERTKARAAKDYQKADALQKILVDAGYRQVPNSRGEQVLAKKYWIRLRGIDAPENSMPYGKEAKEELVKLVQGKALKISIYDKDRYDRLVGDVECNGIFVQEHMLKRGLTWHYTAYDRRLELATISRVFDLRLAADDPWCYCRAIHDSVLMPAWIVFWRADTMKKHQAQGISAGGVYRYTHRREGGADIHDVFVEKSASRLLFSYIGAMLLLANVCYALLKQESLCLSSFWCVPFSAIVAKSLQYKPVKKESLMIMPGFGVQLEQHFWSGRVHRQFVPIGKILKPVLNECVTPVTCYWSLALLVRNED…	uncharacterized protein	Brachypodium distachyon	unclassified	Y	PM, ER	48438.9	30597.1	21741.8	13922.6	28675.1	12107.6	12457.9	11278.3	14536.9	12595.2	21513.8	14412.9	17366.8	20807.4	18525.2	14696.8	15294.5	14394.5	12714	14275	13894.8	11633.4	13214.7	13181.2	12981
Bradi2g05620.1	0.00327403	0.00595239	0.035318	0.00458574	0.0041573	0.00174845	0.592336	0.385162	0.592336	0.44936	0.438486	0.385162	MLSARTAAASPAASLWKRAGGEGGSGNGNGNNGCTSCREVRRRAAVVTVRATPPRRVEAVAMESAAAEIAEAEAEAVAMESAVAEAETAEEEAEKEVAAAGGGVEDKYGEDRATEELPVTPWAFSVASGYTLLRDPHHNKGLAFTEKERDAHYLRGLLPPGVVSQDLQVKKIMHNLRQYKVPLQRYVAMMDLQERNERLFYKLLIDNVEELLPVVYTPTVGEACQKYGSIFRRPQGLYVSLRDKGKVLEVLRNWPERNIQVIVVTDGERILGLGDLGCQGMGIPVGKLSLYTALGGVRPSACLPITIDVGTNNEQLLNDEFYIGLRQRRATGEEYHELMEEFMGAVKQIYGEKVLIQFEDFANHNAFDLLAKYSQSHLVFNDDIQGTASVVLAGLLSSL…	Malic enzyme	Brachypodium distachyon	metabolism	N	chloroplast	11916	15682.9	10004.3	5082.17	10671.3	7289.71	3994.19	6573.49	7426.64	6321.01	4679.08	4225.86	5460.48	4815.62	4795.26	4953.4	4605.55	4614.22	4543.73	4679.23	4485.82	3832.96	4011.31	4110.67	4110.19
Bradi2g06250.1	1.56033e-06	1.06848e-05	0.000860458	2.17804e-05	5.66672e-08	2.84297e-06	0.572774	0.182306	0.572774	0.356737	0.182306	0.317649	MKRNPRVTSSRRKCRKAHFTAPSSVRRVLMSAALSSELRHKYNVRSIPIRKDDEVQVVRGTFKGREGKVVQVYRRRWVIHVERITREKVNGSTVNVGIHPSKVVVTKLKLDKDRKALLDRKARGRAADKAKGKFTADDVAAAAGGAAATGASLQEID	60S ribosomal protein L26-1	Brachypodium distachyon	protein synthesis	N	cytosol	7733.22	7312.33	7943.65	6432.08	7355.32	1934.1	4512.81	5713.24	4691.61	4212.94	2651.02	2744.86	2079.36	3020.4	2623.91	1711.86	1307.28	947.742	1396.79	1340.92	3011.02	812.181	2626.65	2895.77	2336.41
Bradi2g11510.1	1.84451e-05	7.00912e-05	9.2015e-05	7.83033e-05	1.54811e-05	9.40011e-06	0.27371	0.134496	0.27371	0.255624	0.202128	0.134496	MAPLAPSAGARLLRRLLTTAAEVAPEAAPPVTKNARKAAHPIGKKVPSDTAQPVPKVASEAAHPVAVDANKAVTKDSRPLYRRLSALGNAGEGSVSRVLNKWVREGREARSVDLERYVKELRKYKRHAQALELMDWMVHTKGMNMSYTNHAIRLDLVYKVRGIEAAEKYFNGLPDPAKNHRTYGALLNCYCSSKKEEKATDLFHKMDDLGIASSTLPFNNLMSLYMKLGQHKKVAGLFEEMKAKNVKPDNLTCCVLMTSYAALNKIDAVEEVLKEMEEKNAALGWSAYSTLASIYVSAGLVEKAESALKKLEGLVQPRDGRQPFDFLMSLYASVGNLSEVNRVWDVVKATFPKVTNTSYFSMLQALYKLNDADRIKQIFEEWESNHECYDVKLTNIMTR…	pentatricopeptide repeat-containing protein At4g01990, mitochondrial like	Brachypodium distachyon	RNA modification	N	nucleus	691607	1.84202e+06	1.7719e+06	1.93366e+06	1.5598e+06	502852	460324	343528	401023	426932	372964	387835	462923	371165	398722	416855	262215	316882	265166	315279	156322	149685	321734	211403	209786
Bradi2g17040.1	0.000642055	0.00142691	0.0181057	0.0319751	0.000442039	0.000313914	0.645688	0.367605	0.611852	0.645688	0.394527	0.367605	MTKRTKKAGIVGKYGTRYGASLRKQIKKMEVSQHSKYFCEFCGKFAVKRKAVGIWGCKDCGKVKAGGAYTMNTASAVTVRSTIRRLREQTEA	ribosomal protein L37ae	Brachypodium distachyon	protein synthesis	N	cytosol	9623.61	11051.7	17904.6	13702.5	13070.6	5629.09	8702.92	7543.19	10113.9	7997.26	9953.22	9157.3	5990.4	8657.17	8439.52	5028.85	7761.87	3644.11	4191.98	5156.7	3425.92	5014.52	4560.85	6217.96	4804.81
Bradi2g24070.1	1.64088e-06	1.11795e-05	4.53045e-06	0.203076	2.65288e-06	0.000234959	0.847153	0.350967	0.417974	0.847153	0.350967	0.56093	MADEDVQPIVCDNGTGMVKAGFAGDDAPRAVFPSIVGRPRHTGVMVGMGQKDAYVGDEAQAKRGILTLKYPIEHGIVNNWDDMEKIWHHTFYNELRVAPEDHPVLLTEAPLNPKANREKMTQIMFETFNCPAMYVAIQAVLSLYASGRTTGIVLDSGDGVSHTVPIYEGYTLPHAILRLDLAGRDLTDNLMKILTERGYSLTTTAEREIVRDIKEKLAYVALDYEQELETSKSSSSVEKSYEMPDGQVITIGSERFRCPEVLFQPSLVGMEAPGIHEATYNSIMKCDVDIRKDLYGNVVLSGGSTMFPGIADRMSKEITALAPSSMKVKVIAPPERKYSVWIGGSILASLSTFQQMWIAKAEYDESGPGIVHMKCF	actin 7	Brachypodium distachyon	cell structure	N	cytoskeleton	5370.41	4273.69	5459.96	4077.02	4795.27	2095.3	1597.19	1833.71	2491	2004.3	5014.97	3701.21	3678.79	3854.34	4062.33	1992.39	1665.42	1925.52	1148.59	1682.98	2666.57	2074.9	3059.36	2958.42	2689.81
Bradi2g26040.1	3.25861e-06	1.89547e-05	0.001012	2.45193e-06	1.13814e-05	1.68323e-06	0.651468	0.369946	0.651468	0.451558	0.470761	0.369946	MASPQCCANPPTLNPAGGEGKVVDSFGGIRAYVAGAQESKAAVILVSDVFGFEAPNLRKIADKVALSGYFVVVPDFIHGDPYVPESVDKPIAVWIKEHAPEKAFEEAKPVIAALKKQGASSVGAAGYCWGAKVVVELAKANEIQAAVMLHPSFVTVDDIKEVKCPIAILGAEIDKMSPPEVVKQFEQVLSSNSGVGHFVKIFPGVAHGWTVRYNSDDASAVKSAEEALADMTSWFDQNLK	endo-1,3;1,4-beta-D-glucanase	Brachypodium distachyon	growth/development	N	apoplast, cell wall	88820.8	129014	127047	102667	111887	58147.2	61591.3	81226.6	90598.4	72890.9	47366.8	51528.8	50145.3	53053.5	50523.6	52958.9	54832.6	42536.2	60361	52672.2	38660.5	37319	43700.3	45889.2	41392.2
Bradi2g27190.1	5.22677e-06	2.61145e-05	0.00194295	8.91222e-05	6.67353e-07	2.80837e-06	0.660379	0.390506	0.660379	0.515699	0.390506	0.404802	MTAVTPTQEELLRAHLEEQKIEEGDEPVVEDDDDEEDDDDDEDDKDDDDVEGGDASGRSKQSRSEKKSRKAMLKLGMKSITGVSRVTVKKSKNILFVISKPDVFKSPASDTYVIFGEAKIEDLSSQLQSQAAEQFKAPDLSSVISNPEASTAAQDDDEEVDDTDVEPKDIELVMTQAGVPRARAVKALKSADGDIVSAIMELTN	nascent polypeptide-associated complex subunit alpha-like protein 1	Brachypodium distachyon	transcription	N	nucleus	84333.2	98477.1	130757	107228	105199	56110.9	74251.7	66169.4	81352.4	69471.1	59764.6	57440.3	47845.1	51953.9	54251	45732.3	28134	40414.9	50041.7	41080.7	40055	34982.6	43700	51601.2	42584.7
Bradi2g30560.1	1.75934e-05	6.74248e-05	2.11759e-05	1.51046e-05	0.000189727	1.9252e-05	0.413151	0.257782	0.292944	0.306053	0.413151	0.257782	MATTTFPTSTPFFVNHGSRRPSVNVRTAAAVYGRGGRRWRPLRVACEKVVGIDLGTTNSAVAAMEGGKPTIVTNAEGARTTPSVVAYTKAGDRLVGQIAKRQAVVNPENTFFSVKRFIGRKMNEVAEESKQVSYRIIRDDNGNVKLDCPAIGKQFAAEEISAQVLRKLVDDASKFLNDKVTKAVITVPAYFNDSQRTATKDAGRIAGLDVLRIINEPTAASLAYGFEKKNNETILVFDLGGGTFDVSVLEVGDGVFEVLSTSGDTHLGGDDFDKRIVDWLAGSFKNDEGIDLLKDKQALQRLTEAAEKAKMELSSLTQTNISLPFITATADGPKHIETTLTRAKFEELCSDLLDRLRTPVDNSLRDAKLSLKEIDEVILVGGSTRIPAVQDLVKKMTGK…	heat shock protein 70	Brachypodium distachyon	disease/defence	N	nucleus	306073	655571	441980	422542	456542	123523	121114	140730	149598	133741	134299	132966	154965	136674	139726	136298	221051	199808	197326	188621	149954	107203	98194.5	115402	117688
Bradi2g31107.1	0.000256716	0.000643699	0.00357996	0.000451292	0.000426051	0.000114424	0.610811	0.458338	0.610811	0.512776	0.514314	0.458338	MEEKGGGLGRPQRREKRRMCGPAASSEPGSMAMTSQDLCSSRSCEEDGGGTATTHGKWNPYESHRPEIDDAPVFTPTEEEFEDPIGYITSIRPQAEKYGICRIVPPPSWRPPCPLKEKSFWDCTEFNTRVQEVDKLQNREPTKKRTQPRVQKKRKRRKRLRFGMFRRRPSANASENADSEEKFGFQSGSDFTLEEFQKYADEFKQRYFGMKGSDEISLSEIKNHKEIWRPSVEEIEGEYWRIVVCPDDEVEVDYGADLDTATFGSGFPKLSLSDANKQDPYCLSCWNLNNLRRQHGSVLSFETEDISGVVVPWLYVGMCFSSFCWHVEDHFLYSLNYMHFGEQKVWYGVRGDDAVKLEEAMKRNLPRLFEEQPDLLHELVTQLSPSVLKSEGIPVYRVV…	lysine-specific demethylase JMJ18	Brachypodium distachyon	DNA modification; growth/development	N	nucleus	10272.7	9603.5	14660.4	13629.3	12041.5	5611.22	7401.1	6926.58	9481.35	7355.06	6712.13	7277.83	4910.79	5797.53	6174.57	7770.64	7291.79	5540.27	4169.7	6193.1	4782.93	5095.27	6164.44	6033.62	5519.06
Bradi2g35987.1	4.05521e-05	0.000136421	0.00124799	5.52982e-05	7.56704e-05	7.62206e-05	0.657326	0.4977	0.657326	0.556018	0.543993	0.4977	MAGDTASAPASAPPTAELAAVSIADLEPATSRTRIRAILDAGDALAGQRVVVGGWVKTGRQQGKGEFAFLEVNDGSCPGNLQVMVDKDVHPLPRLTPTGTSVLVEGVLKKPPEEAKQRIELKVEKVIEVGEVDAAAYPLPKTRITLETLRDFVHLRARTNTIGAVARIRHQLAFATHSFFDENGFLYIHTPIITTSDCEGAGEMFQVTSLFSQAEKVEKELRENPAPSEADIEAAKLVVKEKGDAVAQLKAAKASKQEITSAVSELHKAKENVSRLEERSKLKPGIPHKDDGTVAFENDFFKRQAFLTVSGQLQVETYACALSSVYTFGPTFRAENSHTSRHLAEFWMVEPEIAFANLQDDMNCAESYVQYLCKWLLKHCREDMEFMVKNYDKTAIERL…	asparagine--tRNA ligase, cytoplasmic 1	Brachypodium distachyon	protein synthesis	N	cytosol	73132.5	71741.1	87052.8	70683.9	75652.6	45996.3	55413.3	43105	54399.2	49728.4	44997.1	42689.5	41002.9	39567.3	42064.2	36561.5	37761.8	51401.7	38892.8	41154.5	36515.2	55943.3	25861.8	32288.9	37652.3
Bradi2g39610.1	5.06977e-05	0.000164001	0.0299184	0.00164285	2.22823e-05	1.80286e-05	0.626772	0.196247	0.626772	0.447682	0.204901	0.196247	MAGRANIPANSSALIAIIADEDTVTGFLMAGVGNVDLRKKTNYLLVDNKTTVKQIEDAFKEFTAREDIAIVLISQYIANMIRFLVDSYNKPIPAILEIPSKDHPYDPANDSVLSRVKYLFSADSVASDRR	V-type proton ATPase subunit F	Brachypodium distachyon	transport	N	vacuole	34760.6	56653.6	63366.8	50447.7	51307.2	49362.2	23434.8	25099.4	30735.2	32157.9	21904.1	13259.7	23210	33503.3	22969.3	9953.78	19703.6	5033.57	7360.68	10512.9	5895.62	12306.1	11421.1	10652.6	10068.9
Bradi2g41660.1	8.8288e-06	3.95683e-05	0.002157	0.000426528	2.18213e-06	1.60243e-05	0.631991	0.313165	0.631991	0.549094	0.313165	0.396726	MEDACLSTQLIDGDGVFNVSGLENFMKEVKLADCGLSYAVVSIMGPQSSGKSTLLNHLFRTNFREMDAFRGRSQTTKGIWMAKAQNIEPCTLVMDLEGTDGRERGEDDTAFEKQSALFALAVSDIVLINMWCHDIGREQAANKPLLKTVFQVMMRLFSPRKTTMLFVIRDKSKTPLENLEPILREDIQKIWDAVPKPHAHKETPLSEFFNVQVVALNSYEEKEELFKQQVSDLRDRFQHSIAPGGLAGDRRGVVPASGFSFSSQQFWKVIKENKDLDLPAHKVMVATVRCEEIGHEKVTSFTADEEWQHFEEAVQSDYVPGFGKKISSLLDRCLSEYDMEAIYFDEGVRTSKRQQLESKLLQLVNPAYQSLLGHLRTRTLEAFKESFDKALEKEGFAVA…	Protein ROOT HAIR DEFECTIVE 3 homolog	Brachypodium distachyon	cell structure; intracellular structure	N	ER	159583	166925	149018	119337	148716	86649.2	80835.2	90898.6	117565	93986.9	72795	56594.4	98652.8	98593	81658.8	38943.3	29775.8	69742.2	47829	46572.6	67765.7	64090.6	66704.1	37436.9	58999.3
Bradi2g44030.1	2.53105e-06	1.56624e-05	0.00758541	0.000279463	2.82323e-06	7.89109e-07	0.592679	0.0749052	0.592679	0.402845	0.117654	0.0749052	MAAAAASDLESKAKEAFVDDDFELAAELYTQAIEAGPATAELYADRAQAHIKLGSYTEAVADANKAIELDPSMHKAYYRKGAACIKLEEYQTAKAALELGSSYASGDARFARLIKECDDRIAEEASQVPAKKATAVVPAATSGATTVATPAEDKEDGANMENSLPNVEVPSKPKYRHDFYNSTTEVVLTIFAKGVPADTVVVDFGEQMLSVSIELPGEEPYHFQPRLFAKIIPEKCKYFVLSTKVEIRLAKAEPLTWTSLDYSGKPKVPQKINLPAESAHRPSYPSSKPKKDWDKLEAEVKKQEKDEKLDGDAALNKFFREIYSDADEDMRRAMMKSFVESNGTVLSTNWKDVGTKKVEGSPPDGMELKKWEY	protein SGT1 homolog	Brachypodium distachyon	disease/defence	N	cytosol	6357.21	8902.78	6672.91	4221.29	6538.55	3855.63	2761.41	4032.7	4851.28	3875.26	2836.24	2708.57	1931.84	3059.44	2634.02	1483.54	910.814	0	682.791	769.287	489.975	0	411.053	1058.05	489.771
Bradi2g47400.1	3.72975e-05	0.000128731	0.00185838	0.997646	3.881e-05	0.528837	0.981421	0.507697	0.654673	0.981421	0.507697	0.898661	MDAAAKGRDGEEQAVESGAEHGKKVSFAGLFRYADGTDLLLMLVGTVAALANGVSQPLMTVIFGDVIDAFGGATTANVLSRVNKAVLSFVYLGIGTAVVSFLQVSCWTITGERQATRIRSLYLKSVLRQDISFFDVEMTTGKIVSRMSGDTVLVQDAIGEKVGKFLQLVASFLGGFIVAFVKGWLLALVMLACIPPVVIAGGAVSKVLSKISSKGQTSYSDAGNVVEQTIGAIKTVVSFNGEKQAIATYNKHIHKAYKTAVEEGLTNGFGMGSVFFIFFSSYGLAIWYGGKLVLSKGYTGGQVITILMAIMTGAMSLGNATPCMTAFAGGQSAAYRLFTTIKRKPEIDPDDKTGKQLEDIRGEVELKDVYFSYPARPEQLIFDGFSLRVASGTTMAIVG…	ABC transporter B family member 4-like	Brachypodium distachyon	transporter	Y	PM	73985.7	76578.2	99203.4	79593.7	82340.3	46849.8	48769	63234.9	56770	53905.9	66205.8	82085.2	83578.3	91372.5	80810.4	29657.1	46312.5	47253.2	43992.7	41803.9	83798.8	72811.6	73381	65992.6	73996
Bradi2g48570.1	3.7789e-05	0.000128731	0.0338279	0.000391559	7.57229e-05	4.00711e-05	0.654704	0.224201	0.654704	0.387781	0.261113	0.224201	MHNIRQYQLPLQRYMAMMDLQEGNERLFYKLLIDNVEELLPVVYTPTVGEACQKYGSIFSRPQGLYISLKEKGKILEVLKNWPERSIQVIVVTDGERILGLGDLGCQGMGIPVGKLSLYTALGGVRPSACLPITLDVGTNNEQLLNDEFYIGLRQRRAIGQEYADFLHEFMAAVKQNYGEKVLIQFEDFANHNAFDLLARYGTTHLVFNDDIQGTASVVLAGLVAALKLVGGTLAEHTYLFLGAGEAGTGIAELIALEMSRQTKIPIEECRKKIWLVDSKGLIVSTRKESLQHFKQPWAHEHEHVGNLLDAVNAIKPTVLIGTSGKGQTFTQEVVEAISSFNEMPIILALSNPTSQAECTAEQAYTWSKGRAVFATGSPFDPVEYNGKMYVPGQANNAY…	Malic enzyme	Brachypodium distachyon	metabolism	N	chloroplast, mitochondria	26329	48406.2	57610.2	40845.6	43297.7	20407.8	31114.5	23866.1	38000.4	28347.2	19555.2	17942.2	19189.1	10473.7	16790	11710.4	12302.1	11345.5	9864.5	11305.6	8823.32	11966.8	10607.1	7432.35	9707.39
Bradi2g50850.1	0.000502335	0.00115051	0.00273911	0.000561887	0.00101483	0.00036872	0.271739	0.105532	0.271739	0.133314	0.203455	0.105532	MAPLTPRLVVPIDVKKKPWEQKVHLHNRWHPDIPPVADVTEGELFRVEMVDWTGGRVSDDNSADDIKFLDLTITHYLSGPFRVIDAEGIPASPGDLLAVEICNLGPLPGDEWGYTAIFERENGGGFLTDHFPSARKAIWYFEGIYAYSPQIPGVRFPGLTHPGIVGTAPSAELLNIWNERERQLTETGHESLKLCEVLHQRPLANLPTPENCLLGKVQEGTAEWQKIANEAARTIPGRENGGNCDIKNLSRGSKVYLPVFVDGANLSTGDMHFSQGDGEVSFCGAIEMSGFLELKCEIIRGGMKEYLTPVGPTPLHVNPIFEIGPVEPRFSEWLVFEGISVDESGKQHFLDASVAYKRAILNAIEYLSRFGYSKEQVYLLLSCCPCEGRISGIVDAPNA…	formamidase-like	Brachypodium distachyon	metabolism	N	cytosol	8421.51	5947.65	4297.67	3665.39	5583.06	0	822.005	2724.94	2521.59	1517.13	494.079	1147.33	742.263	593.516	744.298	0	9.52752	3282.27	1251.81	1135.9	0	46.0415	1106.82	1203.9	589.189
Bradi2g56347.1	1.19061e-06	8.82491e-06	1.88604e-05	3.93491e-05	6.3096e-07	4.89519e-08	0.346134	0.0624945	0.319754	0.346134	0.118593	0.0624945	MDTNTQGLLLPRSDGAVPGVVDFRGGPAPRASTGRWSAAMFVLGVEIAERFAYHGVSANLISYLTGPLGESTAGAAAAINAWSGVATMLPLLVACVADAWLGRYRTIVLASLLFVVSMGMLTLSSALPAFHSDGCSSFTSKSLACSPSPVQVTIFYISLYLVALAEAGHKPCAQAFGADQFDQHHPKESVSRSSFFNWWYFGMCSGTAATTMVSSYIQDNIGWGLGFGIPCLVMVFALAMFLLGTRRYRYYTSTRSSPFARLARALIALIRGSKSSQSDNALASEDDEFNTEHREEVRGLLRLFPIWATCIIYAVIFSQSSTFFTKQAATLDRRIGQSFKVPPAALQTFISVTIITFIPVYDRLFVPVARRFTRLSSGITMLQRIGTGLVLAMVAMAVA…	protein NRT1/PTR FAMILY 5.10	Brachypodium distachyon	transporter	Y	PM	42645.1	82853.6	88781.4	69501	70945.3	18627.8	15060.6	26301.5	30750.1	22685	20879.9	21875.9	19961	35509.5	24556.6	10055.4	9339	7452.58	6807.53	8413.61	3028.93	5227.64	4784.14	4694.04	4433.69
Bradi2g56360.1	0.0264209	0.0365933	0.0460797	0.9323	0.429083	0.020234	0.871923	0.316771	0.406234	0.871923	0.689581	0.316771	MGDTVSGAADYRGQPASRAATGGWKSSIFVMAMEIAERFAYKGVASNLIQYLTGPLGQPMARAAASIDAWKGVSQMLPLPLACIADAWLGRYRAIVLASILFILSMGTLSLSSAVRIFGAGGHVAVFYVALYLVALGEGAHKPCAQAFAADQFDDKDPKESVARSSFFNWWYLGMCSGTAVTIMVSSYVQDNVGWGLGFGIPCIVIAVSLAVFLLGTRSYRYYTTKEPSPVARVGKAFFTLIKSWRSKHRTNPASSAKVEGGDSAEDLVEEVKSVFRLLPIWASCIIYAIIFSQTSTFFTKQAATLDRRIGPSFKVPPAALQTFISISIVVFIPVYDRLFVPLARRYTGRPSGITMLQRVGVGLALSLAAVVLSALVEMKRLRVASAAGLVNTPKTQLP…	protein NRT1/PTR FAMILY 5.10	Brachypodium distachyon	transporter	Y	PM	5402.47	9716.87	16491.9	22062.8	13418.5	3085.59	3275.75	6003.79	9439.1	5451.06	12510.3	17286.6	7039.17	9963.59	11699.9	8674.69	10102.1	9557.36	8678.49	9253.15	3809.09	4468.5	5039.71	3685.09	4250.6
Bradi2g57664.1	0.00208969	0.00402139	0.0143648	0.917951	0.00343259	0.00907642	0.936496	0.590459	0.663272	0.936496	0.590459	0.639626	MGAMSRRVLPACSSLCYFCPSLRARSRQPVKRYKKIISEIYQLPPDGEPNDRRIGKLCDYVSRNPTRIPNITEYLEQRCYKELRHENFTLVKVVPCIYRKLLRSCKEHTPLLATSTMCIVRTLLDQKSNDDLQVLGCLMLVDFLNGQVDSTHMFSLEGLIPKLCRIGQESREDDKGLRLRSAALQALACMVEYMGEHSHISMELDEVVSVIISCYEANQTLSIKEVVRLQDEDDLTMLAVSGQNSAKLASDIRSASENPAHWARVCLRNMANIAKEATTVRRILDPLFRLFDSHNYWSPENGVALSVLQEMQTLMDKSGQNGHLLLSFTIKHIDHKSVAKMPINQISIIKVATHLAKHAKSQASVTVASAISDLIKHLRKCMYCATEASNSQADVDEWN…	uncharacterized protein	Brachypodium distachyon	unclassified	N	unknown	30091.8	37787.2	40400.3	23143.5	32855.7	18550.1	23196.3	19009.7	26413	21792.3	24289.8	30434.4	31247.5	37105.2	30769.2	17437.2	20335.3	20536	19291.3	19399.9	19706.2	23695.3	19945.3	20714.7	21015.4
Bradi2g60910.1	0.00487943	0.0083745	0.0222539	0.26124	0.00229706	0.00798534	0.756208	0.415793	0.572714	0.756208	0.415793	0.501434	MSTAKVLDPAFQGAGQKVGIEIWRIEDFKPVPLPKSDYGKFYCGDSYIVLQTTSPKGGAYLYDIHFWIGKDSSQDEAGTAAIKTVELDSILGGRAVQHRELQGYESDKFLSYFKPCIIPMEGGFASGFKTPEEDKFETRLYICKGRRAIRIKEVPFARSSLNHDDVFILDTESKIYQFNGANSNIQERAKSLEVIQHLKEKYHGGVCDVAIVDDGKLQAESDSGEFWVLFGGFAPIGKKTVSDDDVVLETTPPKLYSINDGQLKLEDTALTKAVLENTRCFLLDCGAEMFVWVGRVTQLDDRKATTKAVEEFIIDQKRPKTTRVTQVIQGYESHAFKSKFESWPVGNVAGNSGAEDGRGKVAALLKQQGVDVKGAAKSSTPINEEVPPLLEGGGKLEVW…	villin-2	Brachypodium distachyon	cell structure, growth/development	N	cytoskeleton	80686.3	77165.9	76521	31634.2	66501.9	33447.5	52272.2	22738.7	43888	38086.6	45741	45723.3	49160.5	60532.2	50289.2	36897.3	22021.4	30082.6	21602.8	27651	30538.7	30617.2	35201.9	37027.5	33346.3
Bradi2g61940.1	6.75347e-05	0.000207055	0.0020544	0.000180483	4.89668e-05	0.000127584	0.415032	0.158831	0.415032	0.257627	0.168761	0.158831	MSSSPGSLGRTDLDGNPVAPLTICMIGAGGFIGSHLCEKLMAETAHVVLAVDVYCDKIRHLVDPAPPHLSGRISFHRLNIKNDSRLEGLIKMADLTINLAAICTPADYNTRPLDTIYSNFIDALPVVKYCSENNKRLIHFSTCEVYGKTIGSFLPKDHPLRKEAEFYVLKEDESPCIFGPIVKQRWSYACAKQLIERLIFAEGAENDLEFTIVRPFNWIGPRMDFIPGVDGPSEGVPRVLACFSNNLLRREPLKLVDGGESQRTFVYIKDAIEAVHLMIENPARANGHIFNVGNPDNEVTVRELAEMMIEVYANVSGEPPLDEPLIDVSAKQFYGEGYDDSDKRIPDMTLINKQLGWNPKTPLKDLLETTLTYQHKTYKEAVKRQMSQATASS	UDP-D-apiose/UDP-D-xylose synthase	Brachypodium distachyon	metabolism, cell structure	N	cytosol	15325.8	20255.5	35099.3	21678.2	23089.7	9775.85	15572.4	5377.52	7606.07	9582.97	4538.01	8716.8	5360.98	5178.4	5948.54	2855.32	4141.62	4979.28	3610.34	3896.64	4503.63	2509.85	4062.89	3593.1	3667.37
Bradi3g00450.1	1.03241e-05	4.40734e-05	1.96373e-05	2.00717e-05	0.000121888	6.03084e-06	0.407511	0.258211	0.258211	0.307257	0.407511	0.267374	MLSFVECNLPWKNLGQMSGNCDMKEIRNQLCDFFMDELDAMHAPRSFGSTPDFSPNKSERGNGKFSSNYAKFKNSFAEDKNDAPPALDKETEDDSYRIPEEDIAFSTEHLGFDHSDKGIDITVFRSDLCNLNNLKVLDASLMRCWTVHLIEKCRKEQIEIGFLDPHVMSYQTIEGGSKENQSEETERAKVRVLRYLADALVVQQDKRFIIFAHNDYYHWITIAIIPSSSEVYYLDSKKKVRNWEKMQKFIDQAWALDHADGPKLSHHFGFDCDQQTETDTVKCGYYACHNMLLIAEWTLANKEGFPVKLGACDAEMVSSQLKKFLDMKIKAEKNKPASQANSAPPMEKEQASQSSSEPPKKSLKIKKKQE	uncharacterized protein	Brachypodium distachyon	unclassified	N	cytosol	111437	256232	220698	218101	201617	48564.4	52254.2	39985.2	67435.2	52059.7	55475.6	58500.3	71815	62001.9	61948.2	77038.2	92833.5	79610	79162.6	82161.1	67604.3	56122.7	48887.2	43014.1	53907.1
Bradi3g03040.1	8.32271e-05	0.000246476	0.00191763	1.43345e-05	0.000120721	0.000494379	0.645895	0.460707	0.645895	0.460707	0.53626	0.581708	MFRNQYDTDVTTWSPAGRLFQVEYAMEAVKQGSACVGLRSATHAVLAAANKSANELSSHQRKVFRVADHAGVALAGLTADGRVLSRFLRSECINHAFVYDAPLPVSRLALRLADKAQVCTQRSWKRPYGVGLLVAGLDESGAHLYYNCPSGNYFEYQAFAIGSRSQAAKTYLERRFEKFNDYTPDQLIRDALSAIKETLQGEKLTSSNCTISIVGRKDDGTVEPFSVIDAKRIQEIIDSMEAADEVPPADAPAESSSMQEGDDTGAAGADPAAPADAPAPMDI	Proteasome subunit alpha type	Brachypodium distachyon	protein destination and storage	N	nucleus, cytosol	43324.2	39150.5	50665.7	28676.3	40454.2	23464.7	27520.6	27587.6	25943.7	26129.2	17759.7	17582.5	15054	24153.8	18637.5	23891.4	21795.5	19222.4	21866.6	21694	21640.2	24720.4	23077.9	24691.6	23532.5
Bradi3g03720.1	0.000201724	0.000520316	0.022657	0.00112358	0.000208801	0.000128458	0.522721	0.121284	0.522721	0.287785	0.161283	0.121284	MSPPENPNGGAAAAPSEPAQPPKPSSSSTSKGKGKKDEKKDDDLSEEDLALKEQLELYVVRAQDTDPGVQKLALESMRQEIRSATSSMTSVPKPLKFLRPHYGTLKSYFESMQEPELKKYMADILSVLALTMAVEGERESLKYRLLGSEGDIGSWGHEYVRNLAGEIAQEFQKRQGDEMPIDALMELVQQIASFHMKHNAEPEAVDLLMEVEDLDLLVEHVDSTNYKRACLYLTSSFKYLPGPDDALALDIAYTIYMKFRDLTNALRIALLLDNKSAQYVKQVYTATDDLSLKKQFSYIIARHGLAMEIDDEIAADENDKEILQEIVNNSKLSEGYLTLARDIEVMEAKSPEDIYKVHLIDGRGASSSLDSARQNLAATFVNAFVNAGFGQDKLMTAPS…	26S proteasome non-ATPase regulatory subunit 2 homolog	Brachypodium distachyon	protein destination and storage	N	nucleus, cytosol	14481.2	11881.2	12845	4476.14	10920.9	5521.63	6226.95	4957.14	6128.59	5708.58	5226.69	3020.57	3880.12	444.107	3142.87	805.402	81.2963	2702.23	3456.51	1761.36	1186.92	2669.27	157.386	1284.55	1324.53
Bradi3g11500.1	4.87574e-05	0.000158491	0.000683775	8.26254e-06	7.55257e-05	0.00201352	0.525457	0.233275	0.466888	0.233275	0.346858	0.525457	METCSLARMMMRLQSLAMHPRDLCSLIFRLLPELLGLPPFLLKKVCKDEHVHPRLMRTTVGMLPELPKDILIDIFVLLDTPDLVRAGSVCSSWYSASTSLCNLGLCRRSQTPCLLYTSESAGESAAGLYSLAEKRSYKLTLPDPPIRSRYVIGSNHGWIVSADNRSELHLLNPITGDQIALPSVTTIEQVKPVFDDYGALHKYELSRYTALKVYEAPRVFDLGELREYVYLKAFLSSDPSTGNYYVVLIHYPYMQLSFARAGDDKWTWLPPHTYCSDCIIEEDLFYVASQDGAIHAFDISGPAVTQRVILDEIKDYISDKIYIAQAPSGDLLQIWKYTEDPDYNDDVSELQIDAEFYARCSTTCKVHKVDLAAKKLVEKNSLGENVLFLGHNPSLCLRA…	putative F-box protein At2g33200	Brachypodium distachyon	unclassified	N	mitochondria	47193.5	57481.5	64606.1	48026.3	54326.9	18762.7	20305.6	27899.5	34490.5	25364.6	8758.74	16370.5	11928.6	13634.6	12673.1	24645.4	13975.3	17314.4	19439.7	18843.7	13042	22057.1	45632	33454.6	28546.4
Bradi3g12520.1	0.0207581	0.0295698	0.0286901	0.0187588	0.0219837	0.0179848	0.0753671	0.00120714	0.0753671	0.00866313	0.0355123	0.00120714	MDFPKEIFLKDYKKPDYLFDTVDLEFQLGSDETIVTSKIAVSPGNEGTSSPLVLHGRDLKLLSIKVNGTELKSDKYTVDPRHLTILTPPAGVFNLEIVTEIYPQLNTSLEGLYRTTGNFCTQCEAEGFRKITYFQDRPDVMAKYTCRIEGDKTLYPVLLSNGNLIKQGDLEGGKHYALWEDPFKKPCYLFALVAGQYECREGSFVTCSGRKVTLRIWTPAEDLPKTSHAMYSLKEAMKWDEEVFGLEYDLDLFNIVVTPDFNMGAMENKSLNVFQSRLVLASPETATDGDYAAILGVIGHEYFHNWTGNRVTCRDWFQLTLKEGLTVFRDQEFSSDLGCRTVKRIADVSKLRSYQFPQDAGPMAHPIRPHSYIKMDNFYTVTVYEKGAEVVRMYKTLFG…	aminopeptidase N-like isoform 1	Brachypodium distachyon	growth/development	N	cytosol	10001.1	5076.65	29134.5	4103.16	12078.9	2085.39	0	0	1556.01	910.349	0	418.563	0	0	104.641	195.304	703.196	0	817.291	428.948	0	58.3233	0	0	14.5808
Bradi3g17680.1	5.52123e-05	0.000176496	0.00148543	6.79014e-05	2.25158e-05	0.000102359	0.646399	0.488376	0.646399	0.540398	0.488376	0.524393	MPPKSSKKDAGPVERPILGRFSSHLKIGIVGLPNVGKSTFFNIVTKLSIPAENFPFCTIEPNEARVYVPDERFDWLCQLYKPKSEVSAYLEINDIAGLVRGASAGEGLGNAFLSHIRAVDGIFHVLRAFEDKEITHIDDTIDPVRDLETISQELRLKDIEFVQARIDDLDKQMKRSNDKQLKIEHELCQRVMAHLREGKDVRLGEWKSAEIEILNTFQLLTAKPVVYLVNMSEKDYQRKKNKFLPKIHAWVQEHGGETIIPFSCAFEQKLVDMPADEAAKYCAENQITSLIPKIIKTGFAAIHLIYFFTAGPDEVKCWQIRRQTKAPQAAGTIHTDFERGFICAEVMKFEDLKELGSESAVKAAGKYRQEGKTYVVQDGDIIFFKFNVSGGGKK	Obg-like ATPase	Brachypodium distachyon	disease/defence	N	cytosol	61369.5	85533.9	90637.2	68724.5	76566.3	43064.7	56415.8	43963.9	54525.2	49492.4	40034.4	48273	35365.8	41831.9	41376.3	38158.5	43480.8	30295.1	37638.3	37393.2	35426.3	32117.9	50528.4	42530.8	40150.9
Bradi3g22550.2	0.000162003	0.000433615	0.00168065	0.000560709	0.000102384	0.000265662	0.596154	0.453263	0.596154	0.550337	0.453263	0.490914	MAATIQSVKARQIFDSRGNPTVEVDVCCSDGTFARAAVPSGASTGVYEALELRDGGSDYLGKGVSKAVNNVNSIIAPALIGKDPTTQAELDNFMVQQLDGTKNEWGWCKQKLGANAILAVSLAVCKAGASVKKIPLYQHIANLAGNKHLVLPVPAFNVINGGSHAGNKLAMQEFMILPTGATSFKEAMKMGVEVYHNLKSVIKKKYGQDATNVGDEGGFAPNIQENKEGLELLKTAIEKAGYTGKVVIGMDVAASEFYNDKDKTYDLNFKEENNDGSQKISGDSLKNVYKSFVSEYPIVSIEDPFDQDDWVHYAKMTEEIGEPVQIVGDDLLVTNPTRVAKAIQEKSCNALLLKVNQIGSVTESIEAVKMSKHAGWGVMTSHRSGETEDTFIADLAVGL…	Enolase	Brachypodium distachyon	metabolism	N	cytosol	359191	670793	544448	459411	508461	284895	316158	262345	349086	303121	264249	317888	227424	309738	279825	220283	251967	217824	231793	230467	220286	244288	275183	258685	249611
Bradi3g33410.1	0.0155555	0.0230851	0.016216	0.0163835	0.016503	0.0165876	0	0	0	0	0	0	MTVVNGRDHLGLGLGLSLGIAGTTSSVAAPQRALTGAAPTPGQKTRTASACHEMPLFLRGIDVNRAPDAGHEEEEPGASSPDSTLSTLSGKRGRSAAGAGGREQERVSDDDEDSGSGAGGSRKKLRLSKDQSAVLEDSFNQHSTLNPKQKAALARQLGLRPRQVEVWFQNRRARTKLKQTEVDCEALRRRCDALTEENRRLLREVQALKLPLPHPQLYMRAPPLTMCPSCERVAPSGKPAVAGNSTALGSGPWGPGPVRPVFVDRPAQRA	homeobox-leucine zipper protein HOX1	Brachypodium distachyon	growth/development	N	nucleus	8.81172	602.428	205.001	219.916	259.039	0	0	0	0	0	0	0	0	0	0	0	0	0	0	0	0	0	0	0	0
Bradi3g34620.1	3.53391e-05	0.000123185	0.00470911	0.000260361	1.42431e-05	4.60992e-05	0.522321	0.165027	0.522321	0.349525	0.165027	0.21385	MVVLAASIISKSGKALVSRQYVDMSRIRIEGLLAAFPKLVGTGKQHTYVETENVRYVYQPIEGLYLLLITNKQSNILEDLDTLRLLSKLVPEYSSLDEDGICKTAFELIFAFDEAISLGNKENVTVQQVKQYCEMESLEEKAHKLMMQSKINDTRDIMKKKANELDKIRMEKGKLDKGAYTSISGPRVMEKTFSDMNISGTGFGSGSGLGGLSTDMDSFASKPKGRPSAAATAPGKGFGMKLGKSQKTNQFLESLKAEGEVILEDAQPSSVQSRSSALPPSDPVTVTIEEKLNVIVKRDGGVDNFDVQGTLALQVLNDADGFIQLQIENHDVSGLSFKTHPNINKELFNSQQIVGAKDPNRPFPSGQNETPLVKWRIQGMNESSLPLSVNCWPSVSGNE…	Coatomer subunit delta	Brachypodium distachyon	protein destination and storage	N	Golgi	2297.15	3224.8	2219.12	1353.87	2273.73	1400.94	984.11	864.024	1501.4	1187.62	624.889	1060.3	616.968	876.749	794.726	322.613	519.518	470.855	187.923	375.227	492.249	328.878	649.011	474.81	486.237
Bradi3g39620.1	1.61703e-05	6.30456e-05	0.000405374	4.96215e-05	2.20903e-05	2.7239e-05	0.505084	0.322111	0.505084	0.408186	0.325265	0.322111	MASETETFAFQAEINQLLSLIINTFYSNKEIFLRELISNSSDALDKIRFESLTDKSKLDAQPELFIHIVPDKATNTLTLIDSGIGMTKSDLVNNLGTIARSGTKEFMEALAAGADVSMIGQFGVGFYSAYLVADRVVVTTKHNDDEQYVWESQAGGSFTVTRDTGESLGRGTKMTLYLKEDQLEYLEERRLKDLVKKHSEFISYPISLWTEKTTEKEISDDEDEEEKKDTEEGKVEEIDEEKEEKEKKKKTIKEVSHEWSLINKQKPIWMRKPEEITKEEYAAFYKSLTNDWEEHLAVKHFSVEGQLEFKAVLFVPKRAPFDLFDTRKKANNIKLYVRRVFIMDNCEELIPEWLGFVKGIVDSEDLPLNISRETLQQNKILKVIRKNLVKKSIELFFEI…	heat shock protein 81-1	Brachypodium distachyon	protein destination and storage, disease/defense	Y	PM, cytosol	52652.6	61961.7	84551	72566.9	67933.1	20345.9	41487.5	26721.8	48692.4	34311.9	34524.7	26693.8	22203.3	27495.5	27729.3	21828.7	15335.5	24538	26682.7	22096.2	17250.2	21529.7	25855.2	22893	21882
Bradi3g40140.1	3.44331e-06	1.94353e-05	0.00719991	8.14304e-05	4.67359e-07	4.28897e-06	0.612147	0.114719	0.612147	0.387506	0.114719	0.225696	MAGFTGTLLPLLLLLSAAAAAAASPAPSDAVSRFQEYLRIDTAQPAPDYAAAVAFLRDQAAAAGLEARTLEPAAGKPLLVLRWLGRRPSLPSILLNSHTDVVPSEPKKWEHAPFSAALDEASGRIYARGSQDMKCVGMQYLEAIRRLRDAGFVPDRNIYITFVPDEEIGGHEGVELFVTSKEFKEMNVGLVLDEGLASPGEEYRVFYAERSPWWLIIKAKGAPGHGAKLYDGSAMENLMKSVEAIRRFRTSQFDLVKSGEKSEGDVVSVNFAYLKAGTPTPTGFVMNLQPSEAEIGIDIRMPPNVHIEALERRLAEEWAPSSRNLTFEFKQKGTVFDNFGKPAMTLADSSNPWWPVFEEAVKRAGGKLSKPEIFPASTDARYFRQIGIPAFGFSPMANT…	N-acyl-L-amino-acid amidohydrolase	Brachypodium distachyon	metabolism	N	cytosol	14263.1	15489.4	11573.8	10168	12873.6	6072.05	7072.18	9265.61	9112.23	7880.52	5443.02	5089.91	2317.22	7104.2	4988.59	1026.94	0	1630.02	3250.4	1476.84	3513.43	3475.92	4632.72	0	2905.52
Bradi3g42000.1	0.000198529	0.000517018	0.000215531	0.00100204	0.000684477	0.000171785	0.451694	0.334247	0.350811	0.451694	0.44008	0.334247	MLFLIAKYLSSSSSRRRGSSKHTAAAPGDNNREMPAAAAVEREREQGCMAGCVPVAMRYKRTGASAKVVTVTASSARTSRHGFVRSAASGLFRDGAAARGRYFTNHESLPPLPEARAEFAAAFPQYSAGAGDGEEAAAAADAIRAREYPHLARHACLDYTGVNLFSHAQMDSSSSSLPSTSSSSPAPAPWQPPFFDVAYRSATLRSQVEQCDSGGIGGGIGRAVARRIMASMKMPEEEYVMVCAANRTSAFRLLAESYAFSSPNSGGRKKKKLLAVYDYESEAVGAMSAAARRRGAEVLHATFTWPGLRLHAADLRKKLLRRHQGLMVFPLVSRMTGARHPYLWMSAAAERGWHVALDASAMGAKDLDTLGLSLLRPDFVVCNFFKVFGENPSGFAGIF…	uncharacterized protein	Brachypodium distachyon	unclassified	N	cytosol	45516.3	82313	43403.7	47213.9	54611.7	24123	16619.9	17784.1	18106.7	19158.4	24521.5	21480.5	30366.7	22302.4	24667.8	18852.5	29679.4	22762.5	24839.5	24033.5	22552.6	18072.1	14469.4	17921	18253.8
Bradi3g43475.1	3.30197e-06	1.89547e-05	0.0014634	0.000346895	6.90564e-07	4.0127e-07	0.628049	0.315033	0.628049	0.574195	0.315033	0.353962	MVLQNDIDLLNPPPELEKRKHKKKRLVQSPNSFFMDVKCQGCFNITTVFSHSQTVVVCPGCQTVLCQPTGGKARLTEGCSFRRKGD	40S ribosomal protein S27	Brachypodium distachyon	protein synthesis	N	cytosol	32781.5	38080.5	38250.1	26716.1	33957	17756.6	17485.6	24963.4	25101.1	21326.7	16270.6	19930.4	20949.9	20841.1	19498	10086.2	15640.4	8641.35	8422.44	10697.6	12259	7044.5	14830.7	13943.8	12019.5
Bradi3g47910.1	6.49903e-06	3.08651e-05	0.00192895	2.54423e-05	2.6708e-06	9.38602e-06	0.657764	0.409217	0.657764	0.475365	0.409217	0.416506	MSGGSTRSSTSSGRISSTTLSDLKDLELSPESGCLSIVVLGASGDLAKKKTFPALFNLFQQGFLQSGEVHIFGYARSNISDDGLRERIRGYLKGASEEHLSQFLKLIKYVSGSYDSSEGFELLNKAISWNETSEKNQPGNYRRLFYLALPPSVYPSVCKMIRTYCMAPSSHTGWTRVIVEKPFGKDLGSSEELSSQLGELFNEQQLYRIDHYLGKELVQNLLVLRFANRFFLPLWNRDNIANVQIVFKEDFGTDGRGGYFDQYGIIRDIIQNHLLQVFCLVAMEKPVSLSPEHIRDEKVKVLQSVDSIKHDEVVLGQYDGYKDDPTVPNESNTPTFASVVLRVHNERWEGVPFILKAGKALNSKKAEIRVQFKDAPGDIFRCKKQGRNEFVIRLQPSEA…	Glucose-6-phosphate dehydrogenase	Brachypodium distachyon	metabolism	N	cytosol	45205.8	49168.2	59152.2	49020.1	50636.6	24468.4	33545.3	33477.9	41736.1	33306.9	27973.4	23517.1	15492.7	29300.2	24070.8	20049.9	27072.8	17909.6	17853	20721.3	16314.8	24589.4	23440.4	20017.2	21090.4
Bradi3g49250.2	1.36177e-07	1.68535e-06	9.32722e-07	9.5001e-10	2.09164e-07	2.70753e-07	0.429842	0.2773	0.429842	0.2773	0.365521	0.394959	MAGNGAISEKDPLNWGAAAAELTGSHLDEVKRMVAQFREPVVKIEGASLRVGQVAAVAQAKDAAGVSVELDEEARPRVKASSEWILSCLAAGGDIYGVTTGFGGTSHRRTKDGPALQVELLRHLNAGIFGTGSDGHSLPAEVTRAAMLVRINTLLQGYSGIRFEILEAITKLLNTGVSPCLPLRGTITASGDLVPLSYIAGLITGRPNAQATTADGRKVDAAEAFKVAGIEGGFFTLNPKEGLAIVNGTSVGSALAATVLFDCNVLAVLSEVLSAVFCEVMNGKPEFTDHLTHKLKHHPGSIEAAAIMEHILAGSSFMSHAKKVNEIDPQLKPKQDRYALRTSPQWLGPQIEVIRSATKSIEREVNSVNDNPVIDVHRGKALHGGNFQGTPIGVSMDNT…	Phenylalanine ammonia-lyase	Brachypodium distachyon	metabolism	N	cytosol	115290	90243	138329	123441	116826	44371.9	50006.6	55408.9	51079.6	50216.7	33579.3	33005.8	29256.6	33741.8	32395.9	48610.4	54474.3	38316.7	29408.1	42702.4	53901.1	37335.6	51876.2	41453	46141.5
Bradi3g52020.1	0.00788081	0.0127933	0.0348182	0.894678	0.0274089	0.007946	0.860348	0.257241	0.410024	0.860348	0.384683	0.257241	MPSSSASTNSFFAIVPLDGGETCRHAMDACYLCGKPLSRICDIFMYRGDTPFCSEECRGVQMEEDEVRERTNAKILKERAARKEQGHGTSTSESNITCAANVPVAS	FLZ-type domain-containing protein	Brachypodium distachyon	unclassified	N	nucleus	5784.04	12680.8	12872.7	9138.26	10119	5017.13	3751.69	2657.88	5169.35	4149.01	3416.18	6356.1	14234.3	10816.7	8705.82	4206.95	1083.26	7002.86	3277.29	3892.59	2546.59	1730.73	2824.42	3310.29	2603.01
Bradi3g53260.1	7.40411e-07	6.1277e-06	2.014e-05	1.17575e-05	1.30794e-07	9.71522e-08	0.387008	0.138576	0.38265	0.387008	0.181207	0.138576	MDSDYGVPRELSEVQKQRTLYQPELPPCLQGTTVRVEYGDVAIAADPTGAHVISHAFPHTYGQPLAHFLRKAAIVPDAKVISEHPAVRVGVVFCGRQSPGGHNVIWGLHEAIKAHNLNSKLIGFLGGTDGLLAQKTLEITNEVLSSYKNQGGYDMLGRTKDQIRTTEQVKGAMASCQALKLDALVIIGGVTSNTDAAQLAETFAEAKCATKVVGVPVTLNGDLKNQFVETTVGFDTICKVNSQLISNVCTDALSAEKYYYFIRMMGRKASHVALECALQSHPNMVILGEEVAASKLTIFDITKQICDAVQARAEKDKYHGVVLIPEGLVESIPELYALLQEINGLHGKGVSIENISSQLSPWASALFEFLPQFIRQQLLLRPESDDSAQLSQIETEKLL…	Pyrophosphate--fructose 6-phosphate 1-phosphotrasferase subunit alpha	Brachypodium distachyon	energy	N	cytosol	28737	35449	42233.9	26747.8	33291.9	9191.1	10051.6	10482.6	21231.4	12739.2	11576.5	11983.4	11243.2	16733.8	12884.2	6291.91	3995.32	8076.43	5767.28	6032.73	3516.51	4115.85	5026.32	5795.18	4613.47
Bradi3g53290.1	0.00118543	0.00244892	0.0269807	0.0120893	0.000791278	0.000662687	0.599901	0.352401	0.599901	0.547443	0.368033	0.352401	MEVAAPAPKHKVKKQINLFYCAECEELALKVAASSDAIQLQSINWRNFPDGFPNLFINNAHDIRGQHVAFLASFSSPAVIFEQISVIFALPKLFIASFTLVLPFFPTGSFERVEEEGDVATAFTLARVLSMIPKSRGGPTSVVIYDIHALQERFYFGDDVLPCFETGIPLLLQRLRQLPDAENITIAFPDDGAWKRFHKLLVNFPMVVCAKVREGDKRIVRIKEGNPEGRHVVIVDDLVQSGGTLRECQKVLAAHGAAKVSAYVTHAVFPNQSYERFMTANSAGPGDQFAYFWITDSCPQTVKAISRHSPFEVLSLAGSIADALQI	ribose-phosphate pyrophosphokinase 4	Brachypodium distachyon	signal transduction	N	cytosol	5344.17	7222.05	12773.5	10319.9	8914.91	4858.95	4972.63	5287.18	6273.48	5348.06	4384.8	5475.7	4331.93	5329.19	4880.41	3312.03	3233.21	3198.35	3380.34	3280.98	2680.83	1441.53	4841.49	3602.63	3141.62
Bradi3g58240.1	1.83217e-06	1.22965e-05	0.00201433	1.88782e-05	1.21972e-06	9.56347e-07	0.542767	0.0871586	0.542767	0.277904	0.167997	0.0871586	MATGGGNLGSVVVAVDGSEESMKALRWALDSVRLRPDGALVVLHVQPRPGIAAGLNPGPIPFGGPREVEVPAFTQAIEAHQRRITEAILEHALKICAEKNVEVKTEVVVGDPKEKICEVAAELKADLLVMGSRAIGPVKRMFLGSVSNYCINSVGCPVVVIKGT	universal stress protein PHOS32	Brachypodium distachyon	disease/defense	N	chloroplast	40436.6	69880.7	56366.9	40364.4	51762.1	21746.5	29727.2	21969.4	38936.2	28094.8	12411.8	17197.4	13198.3	14732.1	14384.9	12589.2	11838	4054.77	6301.47	8695.88	4315.2	1756.2	5323.37	6651.3	4511.52
Bradi4g02587.1	6.68153e-05	0.000205785	0.0104913	0.000108762	0.000132105	8.43633e-05	0.49847	0.0858342	0.49847	0.199563	0.186152	0.0858342	MARRGLMEQDLTKLDVAKLHPLSPEVISRQATINIGTIGHVAHGKSTVVKAISGVQTVRFKNELERNITIKLGYANAKIYKCEDDRCPRPMCYKAYGSGKEDTPICDVPGFENTRMKLLRHVSFVDCPGHDILMATMLNGAAIMDGALLLIAANESCPQPQTSEHLAAVEIMRLQHLIILQNKIDLIQESAAMNQHEAIQKFIQGTIAEGAPVVPISAQLKYNIDVICEYIVKKIPIPERNFTSPPNMIVIRSFDVNKPGSEVDDIRGGVAGGSILRGVLRVNQNIEVRPGIVMKDESGNIKCTPIYSRIVSLYAEQNELQFAVPGGLIGVGTTMDPTLTRADRLVGQVLGEIGSLPDVFVELEINFFLLRRLLGVRTKGTEKAGKVSKLTKGEILMLN…	eukaryotic translation initiation factor 2 subunit gamma	Brachypodium distachyon	protein synthesis	N	cytosol	7157.65	12669.5	16969.8	9951.94	11687.2	3628.57	7899.18	3906.63	7868.53	5825.73	2345.99	3081.49	1032.24	2869.63	2332.34	3407.54	3730.13	1564.73	0	2175.6	823.657	0	1558.38	1630.62	1003.16
Bradi4g04390.1	4.3875e-08	6.65027e-07	0.000118305	1.68651e-05	2.83035e-10	2.01124e-10	0.615165	0.274962	0.615165	0.526251	0.274962	0.279846	MARKKIREYDSKRLLKEHLKRLAGIDLQILSAQVTQSTDFTELVNQEPWLSSMKLVVKPDMLFGKRGKSGLVALNLDLAQVRQFVKERLGVEVEMGGCKAPITTFIVEPFVPHDQEYYLSVVSDRLGCTISFSECGGIDIEENWDKVKTIALTTEKPMTLDACAPLIATLPLEVRTKIGDFIRGVFSVFQDLDFSFLEMNPFTLVNGEPYPLDMRGELDDTAAFKNFKKWGNIEFPLPFGRVMSPSESYIHELDEKTSASLKFTVLNPKGRIWTMVAGGGASVIYADTVGDLGYASELGNYAEYSGAPNEEEVLQYARVVLDCATADPDGRKRALLIGGGIANFTDVASTFSGIIRALREKESKLKAARMNIYVRRGGPNYQTGLAKMRALGSELGLPI…	ATP-citrate synthase alpha chain protein 3	Brachypodium distachyon	metabolism	N	cytosol	93923.4	123834	131766	120252	117444	66296.2	61217.3	79016.5	82459.1	72247.3	53181	60078.4	64943.8	69016.5	61804.9	36984.2	34976.7	31350.4	25858.8	32292.5	22375.4	25453.9	46195	37440.3	32866.2
Bradi4g08430.1	0.00361548	0.00645998	0.00268453	0.00227155	0.0188599	0.00802055	0.392215	0.197177	0.210429	0.197177	0.392215	0.313321	MAAQAASSPSDGGSPAASAAAAAAAAAASSFPATSLYVGDLDMSVQDAQLFDVFAQIGGVVSVRVCRDVTTRKSLGYAYVNYNTPADAARALEMLNFTPINGRPIRIMYSNRDPSLRKSGTANIFIKNLDKSIDNKALYDTFCVFGNILSCKVATDASGESKGYGFVQYERDEAAHAAIEKLNGMLMNDKKVYVGPFIRKQERDNSPGNVKFNNVFVKNLSETTTEDDLREIFGKFGTITSVVVMREGDGRSKCFGFVNFESPDEAALAVQDLNGKKFDDKEWYVGRAQKKSEREMELKEKFEKNLQETADKYQNTNLYLKNLDDTVDDEKLRELFAEFGAITSCKVMRDSNGASRGSGFVAFKSAEDASRALAEMNNKMVGSKPLYVALAQRKEDRKA…	Polyadenylate-binding protein, PABP	Brachypodium distachyon	protein synthesis, disease/defense	N	cytosol	25751.6	11926.9	37080.1	13852.6	22152.8	3653.68	7215.59	3520.45	4256.65	4661.59	5785.1	4279.09	3478.72	3929.18	4368.02	3631.73	8518.98	6277.29	16326.6	8688.65	6536.85	5769.3	9513.22	5944.35	6940.93
Bradi4g15450.2	1.83792e-05	7.00382e-05	0.00362504	0.000734749	3.20399e-06	3.77136e-05	0.628941	0.308138	0.628941	0.555138	0.308138	0.388648	MVGLGAMPGYGIQSMLKEGHKHLSGLDEAVLKNIEACRELSAITRTSLGPNGMNKMVINHLDKLFITNDAATIVNELEVQHPAAKLLVLAARAQQAEIGDGANLTISFAGELLEKAEELIRMGLHPSEIIIGYNKAIIKVLEVLEDLVEKGSENMDVRNKEEVVLRMKSAVASKQFGQEDVLCSLVADACMQVCPKNPANFNVDNVRVAKLVGGGLHNSSVVRGMVLKNDAVGSIKKVEKAKVAVFAGGVDTAATETKGTVLIHSAEQLENYAKTEEAKVEELIKAVADSGAKVIVSGAAVGDMALHFCERYKLMVLKISSKFELRRFCRTTGAIALLKLSQPNADELGYADSVSVEEIGGARVTVVRNEEGGNSVATVLLRGSTDSILDDLERAVDDG…	T-complex protein 1 subunit theta	Brachypodium distachyon	protein destination and storage	N	cytosol	21174.4	26176.7	31667.7	24466.2	25871.3	14253.8	21502.3	11665.8	17664.2	16271.5	12723.8	15041.5	14964.8	14718.5	14362.1	10106.8	7862.36	4576.12	9342.36	7971.92	6844.11	12455.4	13600.8	7318.94	10054.8
Bradi4g21890.1	0.0043952	0.00771018	0.00433501	0.0054504	0.00345287	0.0641201	0.519533	0.242901	0.268273	0.28685	0.242901	0.519533	MAEAILMAVTKIGSVLTEEATKAVIAKLSEKVTNLKELPVKIEQIRKQLTMMGNVISKIGTVYLTDEVVKSWIGEVRNVAYHVEDVMDKYSYHVLQIKEEGFLKKYFIKGTHYAKVFSEIADEVVEVEKEIQEVVRMKDQWLQPCQLVANPLTEMERQRSQDSFPEFVKDEDLVGIKDNRILLTGWLYSEEPEGTVITVSGMGGLGKSTLVTNVYEREKINFPAHAWIVVSQIYTVEDLLRKLLWKIGYTEQPLSAGIDKMDVHDLKKEIQPRLQNKKYLIVLDDVWEPEVYFQIHDVFHNLQGSRIIITTRKDHVAGISSSTRHLELQPLSNRDAFDLFCRRAFYNKKGHMCPKELDAIATSIVDRCHGLPLAIVTIGSMLSSRQQLDFWKQTYNQLQ…	disease resistance protein RPM1	Brachypodium distachyon	disease and defense, signal transduction	Y	PM	42660.2	20441.4	22481.9	12056.9	24410.1	7769.11	4829.49	4695.59	8900.08	6548.57	5963.46	3589.31	9314.74	9140.64	7002.04	7664.61	2581.9	7469.87	6000.59	5929.24	15394.2	8215.89	10058.7	17058.6	12681.9
Bradi4g23450.1	5.77264e-06	2.81365e-05	2.99629e-06	6.14336e-05	0.000191018	2.8867e-06	0.490279	0.320521	0.320521	0.409304	0.490279	0.338646	MLAVCARHGPAKLPPPPLAGERVAWVSGRWWWWRPAAARRGVAVRAPSFNSRIGLDSQNSNTRDLSQLLWVGPVPGDIAEIEAYCRIFRAAEQLQNAVMSALCDPETGECPVRYDVPSEDLPVLEDKVAAVLGCMLALLNRGRTEVLSGRSGVASAFQGSEHSTMDRIPPLALFRGDMKRCCESMQVALASYLVPNEARGLDIWMRLQRLKNACYDAGFARADGHPCPTLFANLFPVYFSTVPDDSGTDELEVAFWRGGQISEEGLAWLLAKGFRTIVDLREEDVKDDLYLSAVQEAVSSGKVEVVNMPVEIGTAPSAEQVQQFAALVSDGAKKPIYLHSKEGVGRTSAMVSRWKQYATRAERLATQNRSPNVNGKALKKHGAEQHTSSPGSSSNGSEN…	probable NAD kinase 2, chloroplastic	Brachypodium distachyon	signal transduction	N	chloroplast	430530	782773	768077	753300	683670	184664	229670	212229	249959	219131	283674	267031	353499	215112	279829	373289	389942	299908	277616	335189	224994	230213	238271	232612	231522
Bradi4g25120.1	0.00015346	0.000412386	0.00275366	0.389673	0.077167	0.96093	1.24419	0.589053	0.589053	0.851366	1.24419	0.950481	MHDPNSESPIYSRHPNKSQSSAKPPHSSSSLSHTHTAQQKQSTLPILAALLPTLLLPHARKSRDLYPSSSSAAAAMGKDCGNHGEDDLRRTCRRLAAFILLLALVVAIIALIVYLVLRPTHPRFFLQDASLRQLDLPQNSSNSGAGGVLSTTLQVTIASRNPNDRVGVYYDRLDVYASYKYQQITLAASLPQVYQGHGDVDVWSPVLSGPGIPFAPYLATSLAGDVQAGYLVLQVKIDGRVRWKVGSWISGHYHIFVTCPAFLVGAGGNGAPGASGLRFQTATYCRVEV	NDR1/HIN1-like protein 1	Brachypodium distachyon	disease and defense	Y	PM	11178.2	10852.4	14696.7	15373.7	13025.2	7134.77	10102.1	6621.6	6831.76	7672.56	9744.58	13443.1	11150.3	10019	11089.2	17589.5	14430.8	18143.4	14660	16205.9	13109.2	10983.9	13672.3	11755.6	12380.2
Bradi4g28070.1	2.18741e-05	8.10664e-05	0.00263535	5.48869e-06	3.39069e-05	9.2913e-05	0.626931	0.371221	0.626931	0.371221	0.405952	0.486143	MTRANGNGTVPVRDNRRSMQHAEGPAAVLAIGTANPTSTIAQQDQFADQFFRVTNSDDLTDLKAKFERICDKTGIEKRHFHMTEEMLLAHPEFLDRDQPSLDARIEIVATAVPKLAESAARKAIAEWGRPASDITHLIFSTYSGCRAPAADLELATLLNLRPTVCRTILSLHGCYGGGRALHLAKELAENNRGARVLVACSEITLVCFNGPDGSNLVGHALFGDGAGAAIVGAGPFDAASGERPLFEMVAATQTTVPKTEHVLGMQVAGGGIDFHLAIQVPMLIGQNVEQCLRDAFRATLGDDDEDGIPCWNDLFWAVHPGGRPILDNIDAVLKLEKGKLAASRQVLREYGNMSGATIVFVLDELRRRREKDGSGGHQLPEWGALLAFGPGITIETMVL…	bidesmethoxycurcumin synthase	Brachypodium distachyon	energy	N	ER	54681.6	47476.8	36909.7	32788.3	42964.1	33871.5	25741.7	27286.1	20842.7	26935.5	18623.9	13527.2	13665.6	17980	15949.2	19072.2	15960.2	17898.9	16834	17441.3	22775.2	23048.1	17079.9	20643.5	20886.7
Bradi4g29770.1	0.000358771	0.000862713	0.0172026	0.184331	0.00048054	0.000264408	0.778479	0.39454	0.637824	0.778479	0.444322	0.39454	MEQGKAALGWAARDASGHLSPYNFSRRVQKDDDVTIKVLFCGICHTDLHIIKNEWGNALYPIVPGHEVVGVVTDVGPGVKNFKAGETVGVGYFLDSCRTCDSCSKGHENYCPTLVLTSNGVDYDGATTQGGFSDVVVVNQDYVVRVPDTLPPDGAAPLLCAGVTVYSPMMQYGLNAPGKHLGVVGLGGLGHMAVKFGKAFGMKVTVISSSLRKREEALDRLGADDFLVSSDAEQMKAAAGAMDGIIDTVSAGHPIVPLLELLRPMGQMVVCGAPSEPLQLPAYAVITGGKRIAGNGVGSVRDCQAMLDFAGEHGITADVEVVKMDYVNTAVERLERNDVRYRFVIDVAGSLQQGGAA	Cinnamyl alcohol dehydrogenase 3	Brachypodium distachyon	cell structure	N	cytosol	36484.3	72128.9	80333.2	59748	62173.6	40282.1	47287.7	28994.7	42058.8	39655.8	47805.1	46926.6	46140	52731.7	48400.8	32048.1	27652.1	27696	23104.2	27625.1	21220.9	24427.2	31719.9	20751.8	24529.9
Bradi4g31310.1	2.69296e-06	1.65128e-05	0.00179424	3.25299e-05	4.0495e-06	1.15691e-05	0.646631	0.341001	0.646631	0.383438	0.341001	0.434433	MASFAHKEHQFLAELGLSPRNPGSFACGAWGGSGPVITTTNPTNNQVIAEVVEASVDDYEKGMNACFDAAKTWMAIPAPKRGEIVRQIGDALRAKLDHLGRLLSLEMGKILPEGIGEVQEIIDMCDYAVGLSRQLNGSIIPSERPNHMMMEVWNPLGVVGVITAFNFPCAVLGWNACIALVCGNCVVWKGAPTTPLITIAMTKIVASVFEKNNLPSAIFTAFCGGAEIGQAIALDRRIPLVSFTGSSKVGQMVQQQVNARFGKCLLELSGNNAIIIMDDADIPLAVRSVLFAAVGTAGQRCTTCRRLVCFFMKAYIKQFLINLLRFINKYALGILWRKGTLLGPLHTTASKESFLKGIQIIKSQGGKILLGGSAIESEGNFVQPTIVEISPSAPVVREE…	aldehyde dehydrogenase family 7 member A1	Brachypodium distachyon	energy	N	peroxisome	53087.4	81192.6	79140.8	78261.9	72920.7	40053.5	43808.4	58487	46262	47152.7	29741.6	35068.4	27075.2	19956.9	27960.5	26070.2	24160.1	17869.4	31364.6	24866.1	25488.3	29507.6	35033.8	36687	31679.2
Bradi4g31330.1	3.72693e-06	2.07753e-05	0.00246372	2.53037e-05	1.53966e-06	2.95471e-05	0.570109	0.18569	0.570109	0.322118	0.18569	0.231002	MMHMTFYWGTSATILFDGWRTSAWPGYLLSLLALFLAAAFYQYLEAFRIRVKLLAGAKAEPLPPPAGSDAARAPLLAPAAALAGGRWPARVATAALFGVNAGIGYLLMLAIMSFNGGVFIAVVLGLAAGYLAFRSSDGEDLVVVDNPCACA	copper transporter 5.1	Brachypodium distachyon	transporter	Y	PM	257301	302263	370483	292101	305537	91703.8	119221	224628	261205	174189	91011.4	100072	86845.3	115746	98418.9	83286.4	55862.1	46080.5	41711	56735	65159.5	64508.9	82817.7	69832.6	70579.7
Bradi4g33090.1	0.0160702	0.0238228	0.0241031	0.0117123	0.0322343	0.0118402	0.481141	0.391442	0.454253	0.391442	0.481141	0.39197	MERLFATEIIGGRALYKLHAVTVAVGICLVLYYRATRVPEQGQGRAAWLGMLAAELCYAAYWVVTQSVRWCPVRRIPFRDRLAARYGERLPCVDIFVCTADPHSEPPSLVISTVLSLMAYNYPTEKISVYLSDDGGSILTFYALWEASLFAKHWLPFCKRYNIEPRSPAAYFSESDGHQDLCTTKEWSLIKDMYEEMTERIDTVVESGKIAEEIKEKHKGFGEWSPEITSKNHQPIVQILVNSKDGNAVDNDGNVLPTLVYMAREKRPQHHHNFKAGAMNALIRVSSVISNSPIIMNVDCDMYSNSSDTITDALCFFLDEEMGHKIGFVQYPQNYNNMTKNNIYGNSLQVINKVELNGLDSVGGPLYIGTGCFHRREILCGRKFTEDYREDWNGGIKDK…	cellulose synthase-like protein E6	Brachypodium distachyon	cell structure	Y	PM, ER	86451.9	64064.8	39332	23291.5	53285	28293	17889.6	23122.1	27514.9	24204.9	18285.8	14145.7	26505	24495.5	20858	23664.6	23338.1	26503.5	29044.3	25637.6	23125.8	11054	25387.8	23977.1	20886.2
Bradi4g38510.1	0.000246074	0.000619317	0.0457758	0.00222701	0.000111458	0.000489097	0.667482	0.28971	0.667482	0.484485	0.28971	0.39262	MSKLQTEALKEAITQVVTEAKEKNRKFTETVELQIGLKNYDPQKDKRFSGSVKLPHVPRPKMRVCMLGDAQHVGEAEKIGLDSMDVEALKKMNKNKKLVKRLAKKYHAFLASEAIIKQIPRLLGPGLNKAGKFPTLVSHQESLEAKVNETKATIKFQLKKVLCMGVAVGNLSMEEKQIQQNIQMSVNFLVSLLKKNWQNVRCLYIKSTMGKPVRVF	Ribosomal protein	Brachypodium distachyon	protein synthesis	N	cytosol	56701.3	88109.9	105830	65039.6	78920.2	46270.9	62032.5	35733.6	66674.3	52677.8	36887.6	39498.8	32240.5	44315.8	38235.7	22298	31027.3	16969.2	21161.3	22863.9	28092.8	18485.6	46236.4	31127.7	30985.6
Bradi4g38860.1	2.12089e-08	3.97372e-07	0.000226939	4.29338e-09	1.23189e-10	1.03513e-07	0.619254	0.203032	0.619254	0.244647	0.203032	0.281051	MGSRYEVELTVGSAKDLKNVNWRNGDLKPYAVLWIDGGAKCSTRVDLDNGENPAWDEKVVVPLPPTSRIQDAVLYIDVVHANAAEGTKPLVGSARLPLRDVVDDAGIGGRASRNLRLKRPSGRPQGRLDVRVAVKEPSRYYDPNPGYPAPAGYPASRDPYAAPAPPSGGYGGYGGGAPPQPYAAAPPSGYPAYGAAPPQPAYGAAPPAYGAAYGSAPQPAYGAAAAPAAYGATSTAADPNKKKGMGMGTGIAVGAAAGVLGGLALAGGASYVENKFEERVAEKVEEDSYGGGYGDYGGDDDY	protein SRC2	Brachypodium distachyon	signal transduction, disease/defense	N	mitochondria	75104.6	74377.1	57623.9	56171.7	65819.3	39133.9	35757.7	47120.9	41023.1	40758.9	18109.2	13923.9	11572.5	20804.4	16102.5	17223.4	11167.4	13964.5	11098.5	13363.4	22119	11137.1	26693.8	14044.5	18498.6
Bradi4g39810.1	0.00316128	0.00577854	0.0119647	0.00280072	0.00240351	0.00425859	0.258043	0.0886432	0.258043	0.108587	0.0886432	0.147919	MTKFEYDHRLVLLPCHLLLCLSVICSCSAEAPAAAGHRPGCPAKCGDVDIPFPFGIGEQCALDGFQLGCNRSIGSRGTGSTSSKPFWGDFEVMSISVPDGKVRVKTLISSLCYDPATNLTTPFEASSDFTNSGFWISDADNKIVVIGCYTLAYMMSSSYVIGCLSRCDDALPLQNGSCSGNGCCQADVPKDITYYESYFNERYNGSVTWRQQDRRCGYMAVMEKAALDFRPSFVTSTVFNDTNNGKVPVILNWLIAQVSCRVARQNMSTYACVSSNSQCLDSTGKQPGYRCRCRNGYEGNPYITGGCQDIDDCLGNSNLCPFGVCVNTPGGYNCPCHPGNSTINGVCVPIQKPSRFPALPVVGASVGLVIIVIAIACACLIRERKKSQKMKENYFRQHG…	putative wall-associated receptor kinase-like 16	Brachypodium distachyon	signal transduction	Y	PM	55414.7	20076.8	20205.1	15468.9	27791.3	8293.78	4262.17	7114.04	9015.41	7171.35	1559.31	2253.69	3114.48	5143.65	3017.78	4758.86	1566.47	1880.85	1647.88	2463.51	4181.04	3851.24	6151.65	2259.59	4110.88
Bradi4g40160.1	0.0191722	0.027691	0.0382719	0.0529021	0.0267451	0.00703628	0.509572	0.323028	0.479758	0.509572	0.445923	0.323028	MELSPWLFMFSVLVKASVIMADTNGQDTAGLIGIAASWNTHPSNWVGNDPCGEKWIGISCTGDRKTVRNSSRGEAWDSFRGHSIFVRIAALGLIPEQEPRRFSSFIHWNLEQPPKLVPFIEQYHSFNADIYLNSNRFTGPIPSSLGRLSKLYWLDLGENMLTGGLPIFDGTNPGLDNLTNTKHFHFGVNQLSGTIPRQIFNSNMKLIHLLLDNNNFSGSMPPTLGLLNTLEVLRFDKNSQLSGAVPTNINNLTKLAELHLENNQLTGPLPDLTGMSSLSFVDMSNNSFNASDAPSWFTALPSLTSLYLENLGIGGQLPQALFSLSAIQTLRLRGNRFNGTLNIGSGFGTQLQKIDLQDNQIAQITVTGTPYDKQLILSGNPICEQGSSEKYCKTTGQSN…	uncharacterized protein	Brachypodium distachyon	unclassified	Y	PM	64084.6	46740	34562.1	16323.6	40427.6	21510.5	14991.6	11312.9	29766.8	19395.4	19469.5	15492	16612.7	30828.9	20600.8	17921.8	14333.7	23136.9	16718	18027.6	12654.7	10307.9	16395.7	12878.6	13059.2
Bradi4g42890.1	5.46141e-09	1.51115e-07	2.86026e-08	6.66142e-11	1.81469e-10	1.65303e-10	0.172445	0.000121148	0.172445	0.0173107	0.000121148	0.00695722	MLAVFSGEVVEVPAELVAAGSRTPSPKTRASELVKRFLAAPGADPAVSVDLGSLGNLAYSHANQSLLLPRSFAAKDEIFCLFEGVLDNLGRLSQQYGLSKGGNEVVLVIEAYKTLRDRAPYPASFMLSQLTGSYAFVLFDKSTSSLLVASDPEGKVPLFWGITADGCVAFSDDIDLLKGSCGKSLAPFPQGCFYWNALGGLKSYENPKNKVTAVPANEEEICGATFMVEGSSTVLTAPLQ	stem-specific protein TSJTI (Glutamine amidotransferases class-II (GATase))	Brachypodium distachyon	metabolism	N	cytosol	26932.2	49677.3	39670.9	43710.7	39997.8	8002.74	4387.45	10241.8	4957.58	6897.4	1582.78	1057.65	129.12	0	692.387	0	0	19.3826	0	4.84566	1043.95	0	69.1396	0	278.273
Bradi5g21630.1	5.8889e-10	3.38445e-08	1.11935e-06	4.69069e-13	6.66134e-16	2.19951e-11	0.564657	0.25523	0.564657	0.392429	0.25523	0.360099	MAEQTEKAFLKQPKVFLSTKKADKAKRPGKAGNRFWKSVGLGFKTPREAIEGTYIDKKCPFTGTVAIRGRIIAGTCHSAKMNRTIIVRRDYLHFVKKYQRYEKRHSNIPAHISPCFRIREGDHVIIGQCRPLSKTVRFNVLKVIPAGSTGGKKAFVAA	protein ECERIFERUM 26-like	Brachypodium distachyon	lipid synthesis	N	cytosol	128226	155185	140498	121041	136238	68005.5	73646.8	82218.4	83839.2	76927.5	54473.2	58991.3	40410.4	59979.1	53463.5	31902.8	40416.4	34980.6	31787.8	34771.9	49766.6	43039.1	50046.1	53383.8	49058.9
Bradi5g21740.1	1.18001e-06	8.82491e-06	2.18134e-07	1.74435e-06	2.57105e-06	7.93618e-07	0.344944	0.263979	0.280345	0.324543	0.344944	0.263979	MEAEQTAELSSVEPTNLKSADKSLVHDDDKENIVNGNSNPKVMETHNYEDDGTGSDGFELVDVKENFDSAKMVEKERESGNVSPLTKGSPKEDEATAESAMLNQETKQLEELSKRIEELESEKHKLMMDMTEAENKQALQYSSLQEAQRSLSDKDKELADATQSLSELGSELEISKRRIQEIEAQLDSSADKLHKLEELKDERSLHAAQEAKRAAELDKMLEMAQLSMKDMENQISDLQEEIKGHQDKAIDHQQVEESLSTTISQFKMVQEALELSKSQVADLEQKLASQDTNISKLTEELSLHCSSEESLKEESLKLETELAAVHEALQAKLLTLQEVEMKLEEQAKDKQTSEATLEKQRVQILHLQSGLDELNDEIVTLKGTLVDSNSKLSERDSML…	centromere-associated protein E isoform X1	Brachypodium distachyon	cell growth & division	N	nucleus	426828	759165	832663	769053	696927	205474	198729	168916	208401	195380	234795	195608	275666	198662	226183	232028	251912	250854	226808	240401	206977	161564	198401	168953	183974
Bradi5g22077.1	0.0148881	0.0222661	0.0132701	0.169824	0.0129526	0.0140485	0.473624	0.127504	0.127936	0.473624	0.127504	0.137178	MGFKPLEWYCQPVSHGAWSRAVESAFGAYTPCGIDTLVVCISYLALFGVCFYRIWRTTKDYTVQRYKLRSPYYNYLLGFLVVYCIAEPLYRIATGTSIMNLDGQSGLAPFEITSLVIETAAWCCMLIMIFLETKVYITEFRWYIRFVVIYVLVGKAAMFNLVLPVRQYYSSSSIFYLYCSEIICQCLFGILMVVYLPSLDPYPGYTPIRSEVLVDNTDYEPLAGEEQVCPERHANILSRIFFSWITPLMQQGYKRPINDNDIWKLDNWDETETLYSRFQKCWNDELQKPKPWLLRALHSSLGGRFWLGGFFKIGNDASQFVGPIILNLLLESMQKGDPSWNGYIYAFSIFAGVSLGVLAEAQYFQNVMRTGFRLRSTLIAAVFRKSLRLTNDSRKQFAS…	ABC transporter C family member 2-like	Brachypodium distachyon	transporter	Y	PM	10349.6	8833.39	5586.29	0	6192.32	1192.22	0	689.893	1286.78	792.223	2774.03	1156.11	2509.36	5291.81	2932.83	1911.69	1098.34	31.7425	116.413	789.548	461.297	913.46	1227.01	796.032	849.449
Bradi5g23940.1	1.13282e-07	1.46408e-06	0.000129068	1.31683e-07	2.02243e-08	2.58935e-09	0.576994	0.232475	0.576994	0.373234	0.232475	0.291056	MAGKEGEEEVYVASIDQGTTSTRFIVYDRHARPVASHQLEFKQHYPEAGWVEHDPMEIMESVRACMANALEKAAADGLNVSAGLKAIGITNQRETTVMWSKSTGLPLYNAIVWMDVRTSSICRRLEGELAGGRTHFVETCGLPISTYFSALKLLWLMENVDAVKDAVRAGDALFGTIDTWLIWNLTGGIGGKDGKQIGQHVTDCSNASRTMLMNLKALDWDKPTLKALGIPADILPKIISNSEKIGLVADGFPLAGVPISGCLGDQHAAMLGQLCQKGEAKSTYGTGAFILLNTGEEVTQSSHGLLSTIAYKLGPSAPTNYALEGSIAIAGAAVQWLRDSLGIIRSAAEIEELAESVQDSGGIYFVPAFNGLFAPWWRDDARGICIGITRFTNKGHIAR…	glycerol kinase	Brachypodium distachyon	signal transduction	N	cytosol, mitochondria	15624.2	15391.7	14619.4	11909.4	14386.2	7126.89	8122.53	7064.88	10888.7	8300.74	5149.04	6752.97	3126.7	6448.95	5369.41	2797.64	4581.3	2274.11	3724.64	3344.42	5210.98	3195.75	3998.86	4343.13	4187.18
Bradi5g26140.1	4.02281e-06	2.19523e-05	0.00102926	0.881103	5.25128e-05	5.08676e-05	0.945552	0.431917	0.642867	0.945552	0.431917	0.535154	MANIDMAAVLADLERDAAADARVPRTKLVCTLGPASRSVPMLEKLLRAGMNVARFNFSHGTHEYHQETLDNLRQAMHNTGVLCAVMLDTKGPEIRTGFLKDGKPIKLTKGQEVTVSTDYDIKGDSTMISMSYKKLPVDVKPGHVILCADGTISLTVLSCDPEAGTVRCRCENTAMLGERKNCNLPGIVVDLPTLTEKDKEDILGWGVPNDIDMIALSFVRKGSDLVTVRKLLGQHAKRIMLMSKVENQEGIVNFDEILRETDAFMVARGDLGMEIPVEKIFLAQKMMIYKCNLAGKPVVTATQMLESMIKSPRPTRAEATDVANAVLDGTDCVMLSGESAAGAYPEVAVKIMARICVEAESSLDNDAVFKEMIRSAPLPMSPLESLASSAVRTANKARA…	Pyruvate kinase	Brachypodium distachyon	signal transduction	N	cytosol	51584.3	66892.9	74312.7	51800.6	61147.6	36923.1	44260.4	30432.5	45623.1	39309.8	59215.6	56710.3	53139.2	62208	57818.3	28185.7	29159.5	27496	20801.5	26410.7	28873.4	34245.5	32602.4	35172.4	32723.4
